# Supplementary material for: Research on the Dynamic Evolution of the Cooperative Network of National Defense Decryption Patents
Source: Research Square preprint supplement (doi:10.21203/rs.3.rs-8510791/v1), 2026-02-03
Supplement: Supplementary file 1 [file 0b494bcb9c15d730da312982.xlsx]

## Sheet: 汇总表数据
日期	source		target
	North China Institute of Optoelectronics Technology	NCIOT	Luoyang Tracking and Communication Technology Research Institute	LTCTRI	92
	Guangzhou Military Region Engineering Research and Design Institute	GMRERDI	State owned 9603 Factory	SF	94
	Guangzhou Military Region Engineering Research and Design Institute	GMRERDI	State owned 9603 Factory	SF	94
	Guangzhou Military Region Engineering Research and Design Institute	GMRERDI	State owned 9603 Factory	SF	94
	Guangzhou Military Region Engineering Research and Design Institute	GMRERDI	Qinhuangdao Yaohua Fiberglass Factory	QYFF	94
	China Ordnance Industry 203 Research Institute	COIRI	State owned 556th Factory	SF	96
	Northwestern Polytechnical University	NPU	Military Representative Office of the Navy in Taiyuan Region	MRONTR	96
	Nanjing University of Science and Technology	NUST	Nanjing Normal University	NNU	96
	Guangzhou Military Region Engineering Research and Design Institute	GMRERDI	General Staff Department Engineering Corps Military Representative Office in Chongqing	GSDECMROC	96
	Guangzhou Military Region Engineering Research and Design Institute	GMRERDI	General Staff Department Engineering Corps Military Representative Office in Chongqing	GSDECMROC	96
	Chinese Astronaut Research and Training Center	CARTC	Fine Chemistry Branch of Beijing Science and Technology Cooperation Center	FCBBSTCC	96
	State owned 662 Factory	SF	General Staff Department Engineering Corps Military Representative Office in Chongqing	GSDECMROC	96
	State owned 662 Factory	SF	General Staff Department Engineering Corps Military Representative Office in Chongqing	GSDECMROC	96
	Medicinal chemistry of the People's Liberation Army	MPLA	Fine Chemistry Branch of Beijing Science and Technology Cooperation Center	FCBBSTCC	96
	Guangzhou Military Region Engineering Research and Design Institute	GMRERDI	State owned 662 Factory	SF	96
	Guangzhou Military Region Engineering Research and Design Institute	GMRERDI	State owned 662 Factory	SF	96
	Chinese Astronaut Research and Training Center	CARTC	Medicinal chemistry of the People's Liberation Army	MPLA	96
	Guangzhou Military Region Engineering Research and Design Institute	GMRERDI	China Yaohua Glass Group Qinhuangdao Yaohua Fiberglass Factory	CYGGQYFF	98
	Hefei Institutes of Physical Science, Chinese Academy of Sciences	HIPSCAS	Anhui Provincial Department of Public Security	APDPS	98
	Chinese Astronaut Research and Training Center	CARTC	Beijing Haiying Plastic arts Design Center	BHPDC	98
	92609 unit of People's Liberation Army	PLA	Institute of Polymer chemistry, Nankai University	IPNU	98
	Beijing Institute of Technology	BIT	152 Factory of China Ordnance Industry Corporation	FCOIC	98
	People's Liberation Army Chongqing Police Area	PLACPA	Beida Jade Bird Universal Sci-Tech Co., Ltd	BJBUSTCL	00
	People's Liberation Army Armoured reconnaissance Engineering College	PLAAEC	Zhongjing Asset Management Co., Ltd	ZAMCL	00
	Guangzhou Military Region Engineering Research and Design Institute	GMRERDI	Hubei Huazhou Co., Ltd	HHCL	00
	Hefei Institutes of Physical Science, Chinese Academy of Sciences	HIPSCAS	Anhui Provincial Department of National Security	APDNS	00
	Engineering Research and Design Institute of Guangzhou Military Region of the People's Liberation Army	ERDIGMRPLA	Nanjing Nangong Mining and Metallurgy Special Equipment Manufacturing Co., Ltd	NNMMSEMCL	02
	Nanjing University of Science and Technology	NUST	Anhui Dongfeng Machinery Factory	ADMF	02
	Beijing Institute of Technology	BIT	China North Industrial Corporation	CNIC	02
	Beijing Institute of Technology	BIT	The 54th Research Institute of the General Staff of the People's Liberation Army General Staff Department	TRIGSPLAGSD	02
	China Electronic Equipment System Engineering Corporation	CEESEC	Wuhan Institute of Physics and Mathematics, Chinese Academy of Sciences	WIPMCAS	02
	Anhui Hongxing Machinery Factory	AHMF	The 54th Research Institute of the General Staff of the People's Liberation Army General Staff Department	TRIGSPLAGSD	02
	Institute of Physics, Chinese Academy of Sciences	IPCAS	Wuhan Institute of Physics and Mathematics, Chinese Academy of Sciences	WIPMCAS	02
	Beijing Institute of Technology	BIT	Anhui Hongxing Machinery Factory	AHMF	02
	China Electronic Equipment System Engineering Corporation	CEESEC	Institute of Physics, Chinese Academy of Sciences	IPCAS	02
	Engineering Research and Design Institute of Guangzhou Military Region of the People's Liberation Army	ERDIGMRPLA	China Yaohua Glass Group Qinhuangdao Yaohua Fiberglass Factory	CYGGQYFF	04
	Engineering Research and Design Institute of Guangzhou Military Region of the People's Liberation Army	ERDIGMRPLA	Nanjing Nangong Mining and Metallurgy Special Equipment Manufacturing Co., Ltd	NNMMSEMCL	04
	National Astronomical Observatories of China, Chinese Academy of Sciences	NAOCCAS	Hangzhou Electronics Institute of technology	HEI	04
	Dalian Naval Academy of the PLA	DNAPLA	Hangzhou Electronics Institute of technology	HEI	04
	National Time Service Center of the Chinese Academy of Sciences	NTSCCAS	National Astronomical Observatories of China, Chinese Academy of Sciences	NAOCCAS	06
	Northwestern Polytechnical University	NPU	Baoji Rare Metal Equipment Design and Development Institute	BRMEDDI	06
	Beijing Institute of Technology	BIT	The 54th Research Institute of the General Staff of the People's Liberation Army General Staff Department	TRIGSPLAGSD	06
	92537 unit of People's Liberation Army	PLA	Rizhao Hatton Plasma electrolytic oxidation Co., Ltd	RHPCL	08
	92537 unit of People's Liberation Army	PLA	Rizhao Hatton Plasma electrolytic oxidation Co., Ltd	RHPCL	08
	Ship Demonstration Institute of People's Liberation Army Navy Equipment Research Institute	SDIPLANERI	Wuxi Wotai Technology Development Co., Ltd	WWTDCL	08
	Oil Training Brigade of Beijing Military Region of the People's Liberation Army	OTBBMRPLA	Quartermaster Supplies and Fuel Department of the Joint Service Department of the Beijing Military Region of the People's Liberation Army	QSFDJSDBMRPLA	08
	Northwestern Polytechnical University	NPU	Xi'an Aerospace Engine Factory	XAEF	08
	Nanjing University of Aeronautics and Astronautics	NUAA	Harbin Electric Machinery Factory Co., Ltd	HEMFCL	08
	Bengbu Shenzhou Machinery Co., Ltd	BSMCL	People's Liberation Army 63983 Unit	PLAU	08
	Unit 66065 of the People's Liberation Army	UPLA	State owned 446 Factory	SF	08
	Panda Electronics Group Co., Ltd	PEGCL	Nanjing Panda Electronics Co., Ltd	NPECL	08
	National Astronomical Observatories of China, Chinese Academy of Sciences	NAOCCAS	National Time Service Center of the Chinese Academy of Sciences	NTSCCAS	08
	Panda Electronics Group Co., Ltd	PEGCL	Nanjing Panda Electronics Co., Ltd	NPECL	08
	Northwest Nonferrous Metals Research Institute	NNMRI	Northwestern Polytechnical University	NPU	08
	Northwest Nuclear Technology Research Institute	NNTRI	Guangyuan Liyuan Radio Equipment Industry Co., Ltd	GLREICL	10
	Northwestern Polytechnical University	NPU	China Ordnance Industry 204 Research Institute	COIRI	10
	Shanghai Institute of Space Propulsion	SISP	Xuzhou Combustion Control Research Institute Co., Ltd	XCCRICL	10
	Southwest Jiaotong University	SJU	Chengdu Jiaotong University Jingyu Technology Co., Ltd	CJUJTCL	10
	Beihang University	BU	People's Liberation Army Navy Equipment Research Institute	PLANERI	10
	Shanghai Satellite Engineering Research Institute	SSERI	Shanghai Satellite Equipment Research Institute	SSERI	10
	Panda Electronics Group Co., Ltd	PEGCL	Nanjing Panda Electronics Co., Ltd	NPECL	10
	Beihang University	BU	Beijing University of Technology	BUT	10
	Beijing Institute of Technology	BIT	Beijing Star Arrow Long Sky Measurement and Control Technology Co., Ltd	BSALSMCTCL	10
	People's Liberation Army Armoured reconnaissance Engineering College	PLAAEC	Dezhou Hengxing Chemical Co., Ltd	DHCCL	10
	Beijing Institute of Information Engineering	BIIE	Beijing Star Arrow Long Sky Measurement and Control Technology Co., Ltd	BSALSMCTCL	10
	Cangzhou Changfeng Machinery Factory	CCMF	Dezhou Hengxing Chemical Co., Ltd	DHCCL	10
	Beijing Institute of Technology	BIT	Beijing Institute of Information Engineering	BIIE	10
	People's Liberation Army Armoured reconnaissance Engineering College	PLAAEC	Cangzhou Changfeng Machinery Factory	CCMF	10
	Northwestern Polytechnical University	NPU	Harbin Institute of Technology	HIT	10
	Northwestern Polytechnical University	NPU	Baoshan Iron and Steel Co., Ltd. Special Steel Branch	BISCLSSB	10
	Northwestern Polytechnical University	NPU	Baoshan Iron and Steel Co., Ltd. Special Steel Branch	BISCLSSB	10
	Northwestern Polytechnical University	NPU	Harbin Institute of Technology	HIT	10
	Northwestern Polytechnical University	NPU	Shenyang Aircraft Industry (Group) Co., Ltd	SAI(G)CL	10
	Northwestern Polytechnical University	NPU	Shenyang Aircraft Industry (Group) Co., Ltd	SAI(G)CL	10
	Harbin Institute of Technology	HIT	Baoshan Iron and Steel Co., Ltd. Special Steel Branch	BISCLSSB	10
	Baoshan Iron and Steel Co., Ltd. Special Steel Branch	BISCLSSB	Harbin Institute of Technology	HIT	10
	Harbin Institute of Technology	HIT	Shenyang Aircraft Industry (Group) Co., Ltd	SAI(G)CL	10
	Baoshan Iron and Steel Co., Ltd. Special Steel Branch	BISCLSSB	Shenyang Aircraft Industry (Group) Co., Ltd	SAI(G)CL	10
	Baoshan Iron and Steel Co., Ltd. Special Steel Branch	BISCLSSB	Shenyang Aircraft Industry (Group) Co., Ltd	SAI(G)CL	10
	Harbin Institute of Technology	HIT	Shenyang Aircraft Industry (Group) Co., Ltd	SAI(G)CL	10
	Military Representative Office of the People's Liberation Army in No. 127 Factory	MROPLANF	Qiqihar North Machinery Co., Ltd	QNMCL	12
	The 704 Research Institute of China Shipbuilding Industry Corporation	TRICSIC	Ship Demonstration Institute of People's Liberation Army Navy Equipment Research Institute	SDIPLANERI	12
	China Electronics Technology Standardization Research Institute	CETSRI	Xidian University	XU	12
	China Electronics Technology Standardization Research Institute	CETSRI	Xidian University	XU	12
	Nankai University	NU	Beijing Space Electromechanical Research Institute	BSERI	12
	Jiangsu Haiming Medical Equipment Co., Ltd	JHMECL	723 Research Institute of China Shipbuilding Industry Corporation	RICSIC	12
	Jiangsu Haiming Medical Equipment Co., Ltd	JHMECL	723 Research Institute of China Shipbuilding Industry Corporation	RICSIC	12
	Shanghai Institute of Silicate, Chinese Academy of Sciences	SISCAS	Dalian Jinma Boron Industry Technology Group Co., Ltd	DJBITGCL	12
	Jiangsu Haiming Medical Equipment Co., Ltd	JHMECL	723 Research Institute of China Shipbuilding Industry Corporation	RICSIC	12
	Jiangsu Haiming Medical Equipment Co., Ltd	JHMECL	723 Research Institute of China Shipbuilding Industry Corporation	RICSIC	12
	Jiangsu Haiming Medical Equipment Co., Ltd	JHMECL	723 Research Institute of China Shipbuilding Industry Corporation	RICSIC	12
	Northwest Nonferrous Metals Research Institute	NNMRI	Liaoning University of Technology	LUT	12
	Northwest Nonferrous Metals Research Institute	NNMRI	Liaoning University of Technology	LUT	12
	People's Liberation Army National University of Defense Science and Technology	PLANUDST	Nanjing Keruida Electronic Equipment Co., Ltd	NKEECL	12
	Shanghai Institute of Space Propulsion	SISP	Nanjing Zhongxu Electronic Technology Co., Ltd	NZETCL	12
	Aviation Industry Corporation of China Leihua Electronic Technology Research Institute	AICCLETRI	State owned 154 Factory	SF	12
	Shanghai Institute of Space Propulsion	SISP	Nanjing Zhongxu Electronic Technology Co., Ltd	NZETCL	12
	Hudong–Zhonghua Shipbuilding (Group) Co., Ltd	HZS(G)CL	Wuxi Shenxi Shipbuilding Equipment Factory	WSSEF	12
	Shanghai Satellite Engineering Research Institute	SSERI	Shanghai Satellite Equipment Research Institute	SSERI	12
	Northwestern Polytechnical University	NPU	Shanxi Pingyang Heavy Industry Machinery Co., Ltd	SPHIMCL	12
	Beihang University	BU	Institute of Microbiology, Chinese Academy of Sciences	IMCAS	12
	Panda Electronics Group Co., Ltd	PEGCL	Nanjing Panda Handa Technology Co., Ltd	NPHTCL	12
	Panda Electronics Group Co., Ltd	PEGCL	Nanjing Panda Handa Technology Co., Ltd	NPHTCL	12
	Nanjing Panda Electronics Co., Ltd	NPECL	Nanjing Panda Handa Technology Co., Ltd	NPHTCL	12
	Nanjing Panda Electronics Co., Ltd	NPECL	Nanjing Panda Handa Technology Co., Ltd	NPHTCL	12
	Panda Electronics Group Co., Ltd	PEGCL	Nanjing Panda Electronics Co., Ltd	NPECL	12
	Panda Electronics Group Co., Ltd	PEGCL	Nanjing Panda Electronics Co., Ltd	NPECL	12
	Northwestern Polytechnical University	NPU	Baoshan Iron and Steel Co., Ltd. Special Steel Branch	BISCLSSB	12
	Northwestern Polytechnical University	NPU	Harbin Institute of Technology	HIT	12
	Northwestern Polytechnical University	NPU	Shenyang Aircraft Industry (Group) Co., Ltd	SAI(G)CL	12
	Baoshan Iron and Steel Co., Ltd. Special Steel Branch	BISCLSSB	Harbin Institute of Technology	HIT	12
	Baoshan Iron and Steel Co., Ltd. Special Steel Branch	BISCLSSB	Shenyang Aircraft Industry (Group) Co., Ltd	SAI(G)CL	12
	Harbin Institute of Technology	HIT	Shenyang Aircraft Industry (Group) Co., Ltd	SAI(G)CL	12
	Unit 32215 of People's Liberation Army	UPLA	Jilin University	JU	14
	Chemical Defense Research Institute of the People's Liberation Army Academy of Military Sciences	CDRIPLAAMS	Institute of Industrial Ecology and Environment, Zhejiang University	IIEEZU	14
	Zhejiang Sci-Tech University	ZSTU	Beijing Institute of Mechanical and Electrical Engineering	BIMEE	14
	Beijing Graphics Research Institute	BGRI	The 54th Research Institute of China Electronics Technology Group Corporation Corporation	TRICETGCC	14
	Beijing Precision Electromechanical Control Equipment Research Institute	BPECERI	China Academy of Launch Vehicle Technology	CALVT	14
	Xidian University	XU	Air Force Engineering University	AFEU	14
	Beijing Telemetry Technology Research Institute	BTTRI	Aerospace Long March Rocket Technology Co., Ltd	ALMRTCL	14
	The 704 Research Institute of China Shipbuilding Industry Corporation	TRICSIC	Ship Demonstration Institute of People's Liberation Army Navy Equipment Research Institute	SDIPLANERI	14
	The 704 Research Institute of China Shipbuilding Industry Corporation	TRICSIC	Ship Demonstration Institute of People's Liberation Army Navy Equipment Research Institute	SDIPLANERI	14
	Beijing Precision Electromechanical Control Equipment Research Institute	BPECERI	China Academy of Launch Vehicle Technology	CALVT	14
	China Academy of Launch Vehicle Technology	CALVT	Beijing Precision Electromechanical Control Equipment Research Institute	BPECERI	14
	Beijing Precision Electromechanical Control Equipment Research Institute	BPECERI	China Academy of Launch Vehicle Technology	CALVT	14
	Chengdu Aircraft Industry (Group) Co., Ltd	CAI(G)CL	Nanchang Hangkong University	NHU	14
	China Electronics Technology Standardization Research Institute	CETSRI	Beihang University	BU	14
	China Electronics Technology Standardization Research Institute	CETSRI	Beihang University	BU	14
	China Electronic Equipment System Engineering Corporation	CEESEC	Beijing Weier Ruichuang Technology Co., Ltd	BWRTCL	14
	China Academy of Launch Vehicle Technology	CALVT	Beijing Precision Electromechanical Control Equipment Research Institute	BPECERI	14
	The 22nd Research Institute of China Electronics Technology Group Corporation Corporation	TRICETGCC	China Electronic Equipment System Engineering Corporation	CEESEC	14
	Beijing Aerospace Automatic Control Research Institute	BAACRI	China Academy of Launch Vehicle Technology	CALVT	16
	Beijing Aerospace Automatic Control Research Institute	BAACRI	China Academy of Launch Vehicle Technology	CALVT	16
	Beijing Aerospace Automatic Control Research Institute	BAACRI	China Academy of Launch Vehicle Technology	CALVT	16
	Beijing Aerospace Long March Aircraft Research Institute	BALMARI	China Academy of Launch Vehicle Technology	CALVT	16
	Aerospace Changping Technology Co., Ltd	ACTCL	People's Liberation Army Logistics Engineering College	PLALEC	16
	People's Liberation Army Logistics Engineering College	PLALEC	Aerospace Changping Technology Co., Ltd	ACTCL	16
	Beijing Guanzhong Jichuang Technology Co., Ltd	BGJTCL	Aeronautics College of the People's Liberation Army Navy Navy	ACPLANN	16
	Aerospace Materials and Technology Research Institute	AMTRI	China Academy of Launch Vehicle Technology	CALVT	16
	Beijing Aerospace Automatic Control Research Institute	BAACRI	China Academy of Launch Vehicle Technology	CALVT	16
	Aerospace Materials and Technology Research Institute	AMTRI	China Academy of Launch Vehicle Technology	CALVT	16
	Beijing Aerospace Automatic Control Research Institute	BAACRI	China Academy of Launch Vehicle Technology	CALVT	16
	Beijing Aerospace Automatic Control Research Institute	BAACRI	China Academy of Launch Vehicle Technology	CALVT	16
	Beijing Aerospace Automatic Control Research Institute	BAACRI	China Academy of Launch Vehicle Technology	CALVT	16
	Beijing Aerospace Automatic Control Research Institute	BAACRI	China Academy of Launch Vehicle Technology	CALVT	16
	Beijing Aerospace Automatic Control Research Institute	BAACRI	China Academy of Launch Vehicle Technology	CALVT	16
	Beijing Aerospace Automatic Control Research Institute	BAACRI	China Academy of Launch Vehicle Technology	CALVT	16
	Beijing Aerospace Automatic Control Research Institute	BAACRI	China Academy of Launch Vehicle Technology	CALVT	16
	Beijing Aerospace Long March Aircraft Research Institute	BALMARI	China Academy of Launch Vehicle Technology	CALVT	16
	Beijing Aerospace Automatic Control Research Institute	BAACRI	China Academy of Launch Vehicle Technology	CALVT	16
	Beijing Institute of Technology	BIT	Beijing Information Science&Technology University	BISTU	16
	Beijing Aerospace Automatic Control Research Institute	BAACRI	China Academy of Launch Vehicle Technology	CALVT	16
	Beijing Aerospace Automatic Control Research Institute	BAACRI	China Academy of Launch Vehicle Technology	CALVT	16
	Beijing Aerospace Automatic Control Research Institute	BAACRI	China Academy of Launch Vehicle Technology	CALVT	16
	Beijing Aerospace Automatic Control Research Institute	BAACRI	China Academy of Launch Vehicle Technology	CALVT	16
	Beijing Aerospace Automatic Control Research Institute	BAACRI	China Academy of Launch Vehicle Technology	CALVT	16
	Aerospace Materials and Technology Research Institute	AMTRI	China Academy of Launch Vehicle Technology	CALVT	16
	Military Representative Office of the Chemical Defense Military Representative Bureau of the General Equipment Department in Wuhan Region	MROCDMRBGEDWR	Xinxiang Taihang Power Equipment Co., Ltd	XTPECL	16
	Beijing Aerospace Automatic Control Research Institute	BAACRI	China Academy of Launch Vehicle Technology	CALVT	16
	Beijing Aerospace Automatic Control Research Institute	BAACRI	China Academy of Launch Vehicle Technology	CALVT	16
	63620 troops of the People's Liberation Army	PLA	Shanghai Jiao Tong University	SJTU	16
	63620 troops of the People's Liberation Army	PLA	Shanghai Jiao Tong University	SJTU	16
	63620 troops of the People's Liberation Army	PLA	Shanghai Jiao Tong University	SJTU	16
	63620 troops of the People's Liberation Army	PLA	Shanghai Jiao Tong University	SJTU	16
	Beijing Aerospace Long March Aircraft Research Institute	BALMARI	China Academy of Launch Vehicle Technology	CALVT	16
	Beijing Aerospace Automatic Control Research Institute	BAACRI	China Academy of Launch Vehicle Technology	CALVT	16
	Beijing Aerospace Long March Aircraft Research Institute	BALMARI	China Academy of Launch Vehicle Technology	CALVT	16
	Beijing Aerospace Long March Aircraft Research Institute	BALMARI	China Academy of Launch Vehicle Technology	CALVT	16
	Beijing Aerospace Long March Aircraft Research Institute	BALMARI	China Academy of Launch Vehicle Technology	CALVT	16
	Beijing Aerospace Long March Aircraft Research Institute	BALMARI	China Academy of Launch Vehicle Technology	CALVT	16
	Beijing Aerospace Long March Aircraft Research Institute	BALMARI	China Academy of Launch Vehicle Technology	CALVT	16
	Beijing Aerospace Long March Aircraft Research Institute	BALMARI	China Academy of Launch Vehicle Technology	CALVT	16
	Beijing Aerospace Long March Aircraft Research Institute	BALMARI	China Academy of Launch Vehicle Technology	CALVT	16
	Aerospace Materials and Technology Research Institute	AMTRI	China Academy of Launch Vehicle Technology	CALVT	16
	Aerospace Materials and Technology Research Institute	AMTRI	China Academy of Launch Vehicle Technology	CALVT	16
	Aerospace Materials and Technology Research Institute	AMTRI	China Academy of Launch Vehicle Technology	CALVT	16
	Aerospace Materials and Technology Research Institute	AMTRI	China Academy of Launch Vehicle Technology	CALVT	16
	Dalian University of Technology	DUT	Dalian Naval Academy of the PLA	DNAPLA	16
	Ship Demonstration Institute of People's Liberation Army Navy Equipment Research Institute	SDIPLANERI	Northwestern Polytechnical University	NPU	16
	China Ordnance Industry 203 Research Institute	COIRI	Xi'an Chuangyida Microelectronics Measurement and Control System Co., Ltd	XCMMCSCL	16
	Xi'an Guiding Technology Co., Ltd	XGTCL	Xi'an Chuangyida Microelectronics Measurement and Control System Co., Ltd	XCMMCSCL	16
	China Ordnance Industry 203 Research Institute	COIRI	Xi'an Guiding Technology Co., Ltd	XGTCL	16
	Beijing Aerospace Long March Aircraft Research Institute	BALMARI	China Academy of Launch Vehicle Technology	CALVT	16
	Beijing Aerospace Long March Aircraft Research Institute	BALMARI	China Academy of Launch Vehicle Technology	CALVT	16
	Beijing Aerospace Long March Aircraft Research Institute	BALMARI	China Academy of Launch Vehicle Technology	CALVT	16
	China Communications Tianjin Waterway Bureau Co., Ltd	CCTWBCL	Unit 91552 of People's Liberation Army	UPLA	16
	China Communications Tianjin Waterway Bureau Co., Ltd	CCTWBCL	Unit 91552 of People's Liberation Army	UPLA	16
	China Communications Tianjin Waterway Bureau Co., Ltd	CCTWBCL	Unit 91552 of People's Liberation Army	UPLA	16
	The 71st Research Institute of China Shipbuilding Industry Corporation	TRICSIC	Huazhong University of Science and Technology	HUST	16
	Aerospace Changping Technology Co., Ltd	ACTCL	People's Liberation Army Logistics Engineering College	PLALEC	16
	Beijing Aerospace Automatic Control Research Institute	BAACRI	China Academy of Launch Vehicle Technology	CALVT	16
	Changsha Xiangji Haidun Technology Co., Ltd	CXHTCL	Hunan Haidun Fiber Optic Sensing Technology Engineering Laboratory Co., Ltd	HHFOSTELCL	16
	Beijing Aerospace Launch Technology Research Institute	BALTRI	China Academy of Launch Vehicle Technology	CALVT	16
	Beijing Aerospace Long March Aircraft Research Institute	BALMARI	China Academy of Launch Vehicle Technology	CALVT	16
	Beijing Aerospace Automatic Control Research Institute	BAACRI	China Academy of Launch Vehicle Technology	CALVT	16
	Beijing Aerospace Automatic Control Research Institute	BAACRI	China Academy of Launch Vehicle Technology	CALVT	16
	Beijing Aerospace Automatic Control Research Institute	BAACRI	China Academy of Launch Vehicle Technology	CALVT	16
	Beijing Aerospace Automatic Control Research Institute	BAACRI	China Academy of Launch Vehicle Technology	CALVT	16
	Beijing Aerospace Automatic Control Research Institute	BAACRI	China Academy of Launch Vehicle Technology	CALVT	16
	92537 unit of People's Liberation Army	PLA	Zhejiang Zhimei Environmental technology Co., Ltd	ZZECL	16
	Beijing Aerospace Automatic Control Research Institute	BAACRI	China Academy of Launch Vehicle Technology	CALVT	16
	Beijing Aerospace Automatic Control Research Institute	BAACRI	China Academy of Launch Vehicle Technology	CALVT	16
	Aerospace Materials and Technology Research Institute	AMTRI	China Academy of Launch Vehicle Technology	CALVT	16
	Beijing Aerospace Automatic Control Research Institute	BAACRI	China Academy of Launch Vehicle Technology	CALVT	16
	Beijing Aerospace Automatic Control Research Institute	BAACRI	China Academy of Launch Vehicle Technology	CALVT	16
	Ship Demonstration Institute of People's Liberation Army Navy Equipment Research Institute	SDIPLANERI	Changshu Ruite Electric Co., Ltd	CRECL	16
	Ship Demonstration Institute of People's Liberation Army Navy Equipment Research Institute	SDIPLANERI	Changshu Ruite Electric Co., Ltd	CRECL	16
	Ship Demonstration Institute of People's Liberation Army Navy Equipment Research Institute	SDIPLANERI	Changshu Ruite Electric Co., Ltd	CRECL	16
	Beijing Aerospace Long March Aircraft Research Institute	BALMARI	China Academy of Launch Vehicle Technology	CALVT	16
	Beijing Aerospace Launch Technology Research Institute	BALTRI	China Academy of Launch Vehicle Technology	CALVT	16
	Beijing Aerospace Automatic Control Research Institute	BAACRI	China Academy of Launch Vehicle Technology	CALVT	16
	Beijing Aerospace Automatic Control Research Institute	BAACRI	China Academy of Launch Vehicle Technology	CALVT	16
	Northwest Nuclear Technology Research Institute	NNTRI	China Flight Test and Research Institute	CFTRI	16
	People's Liberation Army 63983 Unit	PLAU	State owned 9604 Factory	SF	16
	Aerospace Materials and Technology Research Institute	AMTRI	China Academy of Launch Vehicle Technology	CALVT	16
	Beijing Aerospace Automatic Control Research Institute	BAACRI	China Academy of Launch Vehicle Technology	CALVT	16
	Wuhan University	WU	Xi’an Modern Chemistry Research Institute	XMCRI	16
	Beijing Aerospace Automatic Control Research Institute	BAACRI	China Academy of Launch Vehicle Technology	CALVT	16
	Aerospace Materials and Technology Research Institute	AMTRI	China Academy of Launch Vehicle Technology	CALVT	16
	Beijing Aerospace Launch Technology Research Institute	BALTRI	China Academy of Launch Vehicle Technology	CALVT	16
	Beijing Aerospace Long March Aircraft Research Institute	BALMARI	China Academy of Launch Vehicle Technology	CALVT	16
	Xi'an Aisheng Technology Group Co., Ltd	XATGCL	Northwestern Polytechnical University	NPU	16
	Beijing Aerospace Launch Technology Research Institute	BALTRI	China Academy of Launch Vehicle Technology	CALVT	16
	Beijing Aerospace Automatic Control Research Institute	BAACRI	China Academy of Launch Vehicle Technology	CALVT	16
	Beihang University	BU	The Third Research Institute of the Second Artillery Equipment Research Institute of the People's Liberation Army	TTRISAERIPLA	16
	Beijing Aerospace Automatic Control Research Institute	BAACRI	China Academy of Launch Vehicle Technology	CALVT	16
	Northwest Nuclear Technology Research Institute	NNTRI	People's Liberation Army National University of Defense Science and Technology	PLANUDST	16
	Beijing Aerospace Automatic Control Research Institute	BAACRI	China Academy of Launch Vehicle Technology	CALVT	16
	Beijing Aerospace Automatic Control Research Institute	BAACRI	China Academy of Launch Vehicle Technology	CALVT	16
	Fujian Longxi Bearing (Group) Co., Ltd	FLB(G)CL	Lu Tongxin	LT	16
	Beihang University	BU	The 15th Research Institute of China Electronics Technology Group Corporation Corporation	TRICETGCC	16
	Beijing Aerospace Automatic Control Research Institute	BAACRI	China Academy of Launch Vehicle Technology	CALVT	16
	Capital Aerospace Machinery Company	CAMC	China Academy of Launch Vehicle Technology	CALVT	16
	Beijing Aerospace Automatic Control Research Institute	BAACRI	China Academy of Launch Vehicle Technology	CALVT	16
	Beijing Aerospace Automatic Control Research Institute	BAACRI	China Academy of Launch Vehicle Technology	CALVT	16
	Beijing Aerospace Automatic Control Research Institute	BAACRI	China Academy of Launch Vehicle Technology	CALVT	16
	Beijing Aerospace Automatic Control Research Institute	BAACRI	China Academy of Launch Vehicle Technology	CALVT	16
	Beijing Aerospace Automatic Control Research Institute	BAACRI	China Academy of Launch Vehicle Technology	CALVT	16
	Beijing Aerospace Automatic Control Research Institute	BAACRI	China Academy of Launch Vehicle Technology	CALVT	16
	North University of China	NUC	China South Industries Group North Industries Research Institute	CSIGNIRI	16
	Beijing Aerospace Automatic Control Research Institute	BAACRI	China Academy of Launch Vehicle Technology	CALVT	16
	Beijing Aerospace Automatic Control Research Institute	BAACRI	China Academy of Launch Vehicle Technology	CALVT	16
	Aerospace Materials and Technology Research Institute	AMTRI	China Academy of Launch Vehicle Technology	CALVT	16
	Beijing Aerospace Automatic Control Research Institute	BAACRI	China Academy of Launch Vehicle Technology	CALVT	16
	Beijing Aerospace Long March Aircraft Research Institute	BALMARI	China Academy of Launch Vehicle Technology	CALVT	16
	Beihang University	BU	The Second Research Institute of the Second Artillery Equipment Research Institute of the People's Liberation Army	TSRISAERIPLA	16
	The 36th Research Institute of China Electronics Technology Group Corporation Corporation	TRICETGCC	Equipment Overall Demonstration Institute of People's Liberation Army Air Force Equipment Research Institute	EODIPLAAFERI	16
	Beijing Institute of Technology	BIT	Luzhou North Chemical Industry Co., Ltd	LNCICL	16
	Beijing Aerospace Long March Aircraft Research Institute	BALMARI	China Academy of Launch Vehicle Technology	CALVT	16
	Beijing Aerospace Long March Aircraft Research Institute	BALMARI	China Academy of Launch Vehicle Technology	CALVT	16
	Beijing Aerospace Long March Aircraft Research Institute	BALMARI	China Academy of Launch Vehicle Technology	CALVT	16
	The First Affiliated Hospital of the Third Military Medical University of the People's Liberation Army	TFAHTMMUPLA	Chongqing Zhi'en Pharmaceutical Co., Ltd	CZPCL	16
	Beihang University	BU	The 15th Research Institute of China Electronics Technology Group Corporation Corporation	TRICETGCC	16
	Beihang University	BU	The 15th Research Institute of China Electronics Technology Group Corporation Corporation	TRICETGCC	16
	Nanjing Panda Handa Technology Co., Ltd	NPHTCL	Panda Electronics Group Co., Ltd	PEGCL	16
	Shanghai Aerospace Electronics Co., Ltd	SAECL	Shanghai Scientific Instrument Factory	SSIF	16
	Ordnance Technology Research Institute of People's Liberation Army General Armaments Department	OTRIPLAGAD	Nanjing University of Science and Technology	NUST	16
	Naval Equipment Research Institute of the People's Liberation Army Navy	NERIPLAN	The 10th Research Institute of China Electronics Technology Group Corporation Corporation	TRICETGCC	16
	Naval Equipment Research Institute of the People's Liberation Army Navy	NERIPLAN	The 10th Research Institute of China Electronics Technology Group Corporation Corporation	TRICETGCC	16
	Aeronautics College of the People's Liberation Army Navy Navy	ACPLANN	The Third Overall Design Department of China Aerospace Science and Industry Corporation	TTODDCASIC	16
	63928 unit of the People's Liberation Army	PLA	Beijing University of Posts and Telecommunications	BUPT	16
	Beijing Aerospace Automatic Control Research Institute	BAACRI	China Academy of Launch Vehicle Technology	CALVT	16
	Gansu Yinguang Chemical Industry Group Co., Ltd	GYCIGCL	Beijing Institute of Technology	BIT	16
	Changzhou Saiying Optical Materials Co., Ltd	CSOMCL	Institute of Radiation and Radiation Medicine, Academy of Military Medical Sciences, People's Liberation Army	IRRMAMMSPLA	16
	China Ordnance Industry 203 Research Institute	COIRI	Xi'an Guiding Technology Co., Ltd	XGTCL	16
	China Ordnance Industry 203 Research Institute	COIRI	Xi'an Guiding Technology Co., Ltd	XGTCL	16
	China Ordnance Industry 203 Research Institute	COIRI	Xi'an Guiding Technology Co., Ltd	XGTCL	16
	Beijing Institute of Technology	BIT	Shanxi North Xing'an Chemical Industry Co., Ltd	SNXCICL	16
	Tongji University	TU	Dongguan Tongji University Research Institute	DTURI	16
	Aerospace Materials and Technology Research Institute	AMTRI	China Academy of Launch Vehicle Technology	CALVT	16
	Aviation Industry Corporation of China Beijing Institute of Aeronautical Materials	AICCBIAM	Aviation Industry Corporation of China Shenyang Aircraft Design and Research Institute	AICCSADRI	16
	Aviation Industry Corporation of China Xi'an Institute of Aeronautical Computing Technology	AICCXIACT	Northwestern Polytechnical University	NPU	16
	Shandong Special Industry Group Co., Ltd	SSIGCL	China Ordnance Industry 52nd Research Institute	COIRI	16
	Aviation Industry Corporation of China Xi'an Institute of Aeronautical Computing Technology	AICCXIACT	Northwestern Polytechnical University	NPU	16
	Aerospace Materials and Technology Research Institute	AMTRI	China Academy of Launch Vehicle Technology	CALVT	16
	The 20th Research Institute of China Electronics Technology Group Corporation Corporation	TRICETGCC	Beijing Institute of Technology	BIT	16
	Shanghai Institute of Mechanical and Electrical Engineering	SIMEE	Shanghai Materials Research Institute	SMRI	16
	Shanghai Aerospace Precision Machinery Research Institute	SAPMRI	Shanghai Jiao Tong University	SJTU	16
	Beijing Zhuoyue Taikun Technology Co., Ltd	BZTTCL	People's Liberation Army Armoured reconnaissance Engineering College	PLAAEC	16
	Beijing Zhuoyue Taikun Technology Co., Ltd	BZTTCL	People's Liberation Army Armoured reconnaissance Engineering College	PLAAEC	16
	Beijing Zhuoyue Taikun Technology Co., Ltd	BZTTCL	People's Liberation Army Armoured reconnaissance Engineering College	PLAAEC	16
	Institute of Information Engineering, Chinese Academy of Sciences	IIECAS	National Computer Network and Information Security Management Center	NCNISMC	16
	Aerospace Materials and Technology Research Institute	AMTRI	China Academy of Launch Vehicle Technology	CALVT	16
	Beijing Aerospace Automatic Control Research Institute	BAACRI	China Academy of Launch Vehicle Technology	CALVT	16
	Beijing Aerospace Automatic Control Research Institute	BAACRI	China Academy of Launch Vehicle Technology	CALVT	16
	Beijing Aerospace Long March Aircraft Research Institute	BALMARI	China Academy of Launch Vehicle Technology	CALVT	16
	Aerospace Materials and Technology Research Institute	AMTRI	China Academy of Launch Vehicle Technology	CALVT	16
	Beijing Telemetry Technology Research Institute	BTTRI	Beijing Institute of Tracking and Communication Technology	BITCT	16
	Aerospace Materials and Technology Research Institute	AMTRI	China Academy of Launch Vehicle Technology	CALVT	16
	Xidian University	XU	Xi'an Fenghuo Electronic Technology Co., Ltd	XFETCL	16
	Shenyang Aerospace University	SAU	Dalian University of Technology	DUT	16
	Xidian University	XU	Xi'an Fenghuo Electronic Technology Co., Ltd	XFETCL	16
	General Equipment Department Nanjing Military Representative Office in Yangzhou Region Military Representative Office	GEDNMROYRMRO	Jiangsu Baoke Electronics Co., Ltd	JBECL	16
	People's Liberation Army Logistics Engineering College	PLALEC	Weihai Yingdun Special Engineering Materials Co., Ltd	WYSEMCL	16
	People's Liberation Army Logistics Engineering College	PLALEC	Weihai Yingdun Special Engineering Materials Co., Ltd	WYSEMCL	16
	People's Liberation Army Logistics Engineering College	PLALEC	Weihai Yingdun Special Engineering Materials Co., Ltd	WYSEMCL	16
	People's Liberation Army Logistics Engineering College	PLALEC	Weihai Yingdun Special Engineering Materials Co., Ltd	WYSEMCL	16
	People's Liberation Army Logistics Engineering College	PLALEC	Weihai Yingdun Special Engineering Materials Co., Ltd	WYSEMCL	16
	Beijing Aerospace Long March Aircraft Research Institute	BALMARI	China Academy of Launch Vehicle Technology	CALVT	16
	Shanghai Aerospace Electronic Communication Equipment Research Institute	SAECERI	Naval Engineering University	NEU	16
	Beijing Aerospace Long March Aircraft Research Institute	BALMARI	China Academy of Launch Vehicle Technology	CALVT	16
	Ship Demonstration Institute of People's Liberation Army Navy Equipment Research Institute	SDIPLANERI	Shanghai Jiao Tong University	SJTU	16
	Ship Demonstration Institute of People's Liberation Army Navy Equipment Research Institute	SDIPLANERI	Shanghai Jiao Tong University	SJTU	16
	Ship Demonstration Institute of People's Liberation Army Navy Equipment Research Institute	SDIPLANERI	Shanghai Jiao Tong University	SJTU	16
	Ship Demonstration Institute of People's Liberation Army Navy Equipment Research Institute	SDIPLANERI	Shanghai Jiao Tong University	SJTU	16
	Beijing Aerospace Long March Aircraft Research Institute	BALMARI	China Academy of Launch Vehicle Technology	CALVT	16
	Beijing Aerospace Automatic Control Research Institute	BAACRI	China Academy of Launch Vehicle Technology	CALVT	16
	Aerospace Materials and Technology Research Institute	AMTRI	China Academy of Launch Vehicle Technology	CALVT	16
	State owned 844 Factory	SF	Anjieli Electronic Technology (Suzhou) Co., Ltd	AET(S)CL	16
	Anjieli Electronic Technology (Suzhou) Co., Ltd	AET(S)CL	State owned 844 Factory	SF	16
	Beijing Aerospace Long March Aircraft Research Institute	BALMARI	China Academy of Launch Vehicle Technology	CALVT	16
	Beijing Aerospace Long March Aircraft Research Institute	BALMARI	China Academy of Launch Vehicle Technology	CALVT	16
	Aerospace Materials and Technology Research Institute	AMTRI	China Academy of Launch Vehicle Technology	CALVT	16
	Aerospace Materials and Technology Research Institute	AMTRI	China Academy of Launch Vehicle Technology	CALVT	16
	China Ordnance Industry 203 Research Institute	COIRI	Xi'an Guiding Technology Co., Ltd	XGTCL	16
	Beijing Aerospace Automatic Control Research Institute	BAACRI	China Academy of Launch Vehicle Technology	CALVT	16
	General Research Institute for Nonferrous Metals	GRINM	Youyan Yijin New Materials Co., Ltd	YYNMCL	16
	Beijing Aerospace Automatic Control Research Institute	BAACRI	China Academy of Launch Vehicle Technology	CALVT	16
	Beijing Aerospace Automatic Control Research Institute	BAACRI	China Academy of Launch Vehicle Technology	CALVT	16
	Beijing Aerospace Long March Aircraft Research Institute	BALMARI	China Academy of Launch Vehicle Technology	CALVT	16
	China Ordnance Industry Navigation and Control Technology Research Institute	COINCTRI	China North Industrial Corporation	CNIC	16
	The 32nd Research Institute of China Electronics Technology Group Corporation Corporation	TRICETGCC	The 61st Research Institute of the General Staff of the People's Liberation Army General Staff Department	TRIGSPLAGSD	16
	Aerospace Materials and Technology Research Institute	AMTRI	China Academy of Launch Vehicle Technology	CALVT	16
	People's Liberation Army University of Science and Technology	PLAUST	The 28th Research Institute of China Electronics Technology Group Corporation Corporation	TRICETGCC	16
	Aerospace Materials and Technology Research Institute	AMTRI	China Academy of Launch Vehicle Technology	CALVT	16
	Aerospace Materials and Technology Research Institute	AMTRI	China Academy of Launch Vehicle Technology	CALVT	16
	Beijing Aerospace Automatic Control Research Institute	BAACRI	China Academy of Launch Vehicle Technology	CALVT	16
	Xinxiang Taihang Power Equipment Co., Ltd	XTPECL	Military Representative Office of the Chemical Defense Military Representative Bureau of the General Equipment Department in Wuhan Region	MROCDMRBGEDWR	16
	Beijing Aerospace Automatic Control Research Institute	BAACRI	China Academy of Launch Vehicle Technology	CALVT	16
	Beijing Aerospace Long March Aircraft Research Institute	BALMARI	China Academy of Launch Vehicle Technology	CALVT	16
	Unit 91655 of People's Liberation Army	UPLA	Institute of Computing Technology, Chinese Academy of Sciences	ICTCAS	16
	Unit 91655 of People's Liberation Army	UPLA	China Electronics Marine Information Technology Research Institute Co., Ltd	CEMITRICL	16
	Aerospace Materials and Technology Research Institute	AMTRI	China Academy of Launch Vehicle Technology	CALVT	16
	Aerospace Materials and Technology Research Institute	AMTRI	China Academy of Launch Vehicle Technology	CALVT	16
	Aerospace Materials and Technology Research Institute	AMTRI	China Academy of Launch Vehicle Technology	CALVT	16
	Beijing Aerospace Long March Aircraft Research Institute	BALMARI	China Academy of Launch Vehicle Technology	CALVT	16
	Beijing Aerospace Systems Engineering Research Institute	BASERI	China Academy of Launch Vehicle Technology	CALVT	16
	Beijing Aerospace Long March Aircraft Research Institute	BALMARI	China Academy of Launch Vehicle Technology	CALVT	16
	Aerospace Materials and Technology Research Institute	AMTRI	China Academy of Launch Vehicle Technology	CALVT	16
	Aerospace Materials and Technology Research Institute	AMTRI	China Academy of Launch Vehicle Technology	CALVT	16
	Changzhi Tsinghua Machinery Factory	CTMF	China Academy of Launch Vehicle Technology	CALVT	16
	Changzhi Tsinghua Machinery Factory	CTMF	China Academy of Launch Vehicle Technology	CALVT	16
	The 54th Research Institute of China Electronics Technology Group Corporation Corporation	TRICETGCC	Beijing University of Posts and Telecommunications	BUPT	16
	The 54th Research Institute of China Electronics Technology Group Corporation Corporation	TRICETGCC	Beijing University of Posts and Telecommunications	BUPT	16
	The Third Research Institute of the Second Artillery Equipment Research Institute of the People's Liberation Army	TTRISAERIPLA	Hunan Aerospace Electromechanical Equipment and Special Materials Research Institute	HAEESMRI	16
	Beijing Aerospace Automatic Control Research Institute	BAACRI	China Academy of Launch Vehicle Technology	CALVT	16
	People's Liberation Army 63983 Unit	PLAU	Beijing Zhongke Feihong Technology Co., Ltd	BZFTCL	16
	715 Research Institute of China Shipbuilding Industry Corporation	RICSIC	Guangzhou Huagong Baichuan Technology Co., Ltd	GHBTCL	16
	China Ordnance Industry 52nd Research Institute	COIRI	Armoured reconnaissance Equipment Technology Research Institute of People's Liberation Army General Armaments Department	AETRIPLAGAD	16
	China Ordnance Industry 52nd Research Institute	COIRI	Armoured reconnaissance Equipment Technology Research Institute of People's Liberation Army General Armaments Department	AETRIPLAGAD	16
	Beijing Institute of Technology	BIT	Beijing Zhongyu Xintai Technology Development Co., Ltd	BZXTDCL	16
	Beijing Institute of Near Space Vehicle Systems Engineering	BINSVSE	China Academy of Launch Vehicle Technology	CALVT	16
	People's Liberation Army University of Science and Technology	PLAUST	Jiangsu Zhen'an Power Equipment Co., Ltd	JZPECL	16
	China Ordnance Industry 203 Research Institute	COIRI	Nanjing University of Science and Technology	NUST	16
	China Ordnance Industry 203 Research Institute	COIRI	Nanjing University of Science and Technology	NUST	16
	China Ordnance Industry 203 Research Institute	COIRI	Nanjing University of Science and Technology	NUST	16
	Jiangsu Zhen'an Xinrun Power Technology Co., Ltd	JZXPTCL	Jiangsu Zhen'an Power Equipment Co., Ltd	JZPECL	16
	Xi'an Guiding Technology Co., Ltd	XGTCL	Nanjing University of Science and Technology	NUST	16
	Xi'an Guiding Technology Co., Ltd	XGTCL	Nanjing University of Science and Technology	NUST	16
	Xi'an Guiding Technology Co., Ltd	XGTCL	Nanjing University of Science and Technology	NUST	16
	People's Liberation Army University of Science and Technology	PLAUST	Jiangsu Zhen'an Xinrun Power Technology Co., Ltd	JZXPTCL	16
	China Ordnance Industry 203 Research Institute	COIRI	Xi'an Guiding Technology Co., Ltd	XGTCL	16
	China Ordnance Industry 203 Research Institute	COIRI	Xi'an Guiding Technology Co., Ltd	XGTCL	16
	China Ordnance Industry 203 Research Institute	COIRI	Xi'an Guiding Technology Co., Ltd	XGTCL	16
2017/12/15 星期五	Beijing Aerospace Long March Aircraft Research Institute	BALMARI	China Academy of Launch Vehicle Technology	CALVT	总
2017/12/15 星期五	Beijing Aerospace Long March Aircraft Research Institute	BALMARI	China Academy of Launch Vehicle Technology	CALVT	总
2017/12/15 星期五	Beijing Aerospace Long March Aircraft Research Institute	BALMARI	China Academy of Launch Vehicle Technology	CALVT	总
2017/5/16 星期二	China Communications Tianjin Waterway Bureau Co., Ltd	CCTWBCL	Unit 91552 of People's Liberation Army	UPLA	总
2017/5/16 星期二	China Communications Tianjin Waterway Bureau Co., Ltd	CCTWBCL	Unit 91552 of People's Liberation Army	UPLA	总
2017/7/13 星期四	China Communications Tianjin Waterway Bureau Co., Ltd	CCTWBCL	Unit 91552 of People's Liberation Army	UPLA	总
2017/5/2 星期二	The 71st Research Institute of China Shipbuilding Industry Corporation	TRICSIC	Huazhong University of Science and Technology	HUST	总
2017/8/15 星期二	Aerospace Changping Technology Co., Ltd	ACTCL	People's Liberation Army Logistics Engineering College	PLALEC	总
2017/8/15 星期二	Beijing Aerospace Automatic Control Research Institute	BAACRI	China Academy of Launch Vehicle Technology	CALVT	总
2017/12/29 星期五	Changsha Xiangji Haidun Technology Co., Ltd	CXHTCL	Hunan Haidun Fiber Optic Sensing Technology Engineering Laboratory Co., Ltd	HHFOSTELCL	总
2017/11/10 星期五	Beijing Aerospace Launch Technology Research Institute	BALTRI	China Academy of Launch Vehicle Technology	CALVT	总
2017/2/28 星期二	Beijing Aerospace Long March Aircraft Research Institute	BALMARI	China Academy of Launch Vehicle Technology	CALVT	总
2017/12/15 星期五	Beijing Aerospace Automatic Control Research Institute	BAACRI	China Academy of Launch Vehicle Technology	CALVT	总
2017/12/15 星期五	Beijing Aerospace Automatic Control Research Institute	BAACRI	China Academy of Launch Vehicle Technology	CALVT	总
2017/12/15 星期五	Beijing Aerospace Automatic Control Research Institute	BAACRI	China Academy of Launch Vehicle Technology	CALVT	总
2017/12/15 星期五	Beijing Aerospace Automatic Control Research Institute	BAACRI	China Academy of Launch Vehicle Technology	CALVT	总
2017/11/10 星期五	Beijing Aerospace Automatic Control Research Institute	BAACRI	China Academy of Launch Vehicle Technology	CALVT	总
2017/12/14 星期四	92537 unit of People's Liberation Army	PLA	Zhejiang Zhimei Environmental technology Co., Ltd	ZZECL	总
2017/1/10 星期二	Beijing Aerospace Automatic Control Research Institute	BAACRI	China Academy of Launch Vehicle Technology	CALVT	总
2017/12/15 星期五	Beijing Aerospace Automatic Control Research Institute	BAACRI	China Academy of Launch Vehicle Technology	CALVT	总
2017/9/15 星期五	Aerospace Materials and Technology Research Institute	AMTRI	China Academy of Launch Vehicle Technology	CALVT	总
2017/8/15 星期二	Beijing Aerospace Automatic Control Research Institute	BAACRI	China Academy of Launch Vehicle Technology	CALVT	总
2017/10/17 星期二	Beijing Aerospace Automatic Control Research Institute	BAACRI	China Academy of Launch Vehicle Technology	CALVT	总
2017/12/15 星期五	Ship Demonstration Institute of People's Liberation Army Navy Equipment Research Institute	SDIPLANERI	Changshu Ruite Electric Co., Ltd	CRECL	总
2017/12/15 星期五	Ship Demonstration Institute of People's Liberation Army Navy Equipment Research Institute	SDIPLANERI	Changshu Ruite Electric Co., Ltd	CRECL	总
2017/12/15 星期五	Ship Demonstration Institute of People's Liberation Army Navy Equipment Research Institute	SDIPLANERI	Changshu Ruite Electric Co., Ltd	CRECL	总
2016/12/13 星期二	Beijing Aerospace Automatic Control Research Institute	BAACRI	China Academy of Launch Vehicle Technology	CALVT	总
2016/12/13 星期二	Beijing Aerospace Automatic Control Research Institute	BAACRI	China Academy of Launch Vehicle Technology	CALVT	总
2017/12/15 星期五	Beijing Aerospace Long March Aircraft Research Institute	BALMARI	China Academy of Launch Vehicle Technology	CALVT	总
2017/9/15 星期五	Beijing Aerospace Launch Technology Research Institute	BALTRI	China Academy of Launch Vehicle Technology	CALVT	总
2017/8/15 星期二	Beijing Aerospace Automatic Control Research Institute	BAACRI	China Academy of Launch Vehicle Technology	CALVT	总
2016/12/13 星期二	Beijing Aerospace Automatic Control Research Institute	BAACRI	China Academy of Launch Vehicle Technology	CALVT	总
2017/1/10 星期二	Beijing Aerospace Automatic Control Research Institute	BAACRI	China Academy of Launch Vehicle Technology	CALVT	总
2017/9/28 星期四	Northwest Nuclear Technology Research Institute	NNTRI	China Flight Test and Research Institute	CFTRI	总
2017/9/15 星期五	People's Liberation Army 63983 Unit	PLAU	State owned 9604 Factory	SF	总
2017/8/15 星期二	Aerospace Materials and Technology Research Institute	AMTRI	China Academy of Launch Vehicle Technology	CALVT	总
2017/11/10 星期五	Beijing Aerospace Automatic Control Research Institute	BAACRI	China Academy of Launch Vehicle Technology	CALVT	总
2017/11/10 星期五	Wuhan University	WU	Xi’an Modern Chemistry Research Institute	XMCRI	总
2017/12/14 星期四	Beijing Aerospace Automatic Control Research Institute	BAACRI	China Academy of Launch Vehicle Technology	CALVT	总
2017/11/10 星期五	Aerospace Materials and Technology Research Institute	AMTRI	China Academy of Launch Vehicle Technology	CALVT	总
2017/12/15 星期五	Beijing Aerospace Launch Technology Research Institute	BALTRI	China Academy of Launch Vehicle Technology	CALVT	总
2017/8/15 星期二	Beijing Aerospace Long March Aircraft Research Institute	BALMARI	China Academy of Launch Vehicle Technology	CALVT	总
2017/7/28 星期五	Xi'an Aisheng Technology Group Co., Ltd	XATGCL	Northwestern Polytechnical University	NPU	总
2017/6/29 星期四	Beijing Aerospace Launch Technology Research Institute	BALTRI	China Academy of Launch Vehicle Technology	CALVT	总
2017/10/17 星期二	Beijing Aerospace Automatic Control Research Institute	BAACRI	China Academy of Launch Vehicle Technology	CALVT	总
2017/10/17 星期二	Beihang University	BU	The Third Research Institute of the Second Artillery Equipment Research Institute of the People's Liberation Army	TTRISAERIPLA	总
2017/2/28 星期二	Beijing Aerospace Automatic Control Research Institute	BAACRI	China Academy of Launch Vehicle Technology	CALVT	总
2017/7/28 星期五	Northwest Nuclear Technology Research Institute	NNTRI	People's Liberation Army National University of Defense Science and Technology	PLANUDST	总
2017/6/29 星期四	Beijing Aerospace Automatic Control Research Institute	BAACRI	China Academy of Launch Vehicle Technology	CALVT	总
2017/4/18 星期二	Beijing Aerospace Automatic Control Research Institute	BAACRI	China Academy of Launch Vehicle Technology	CALVT	总
2017/8/15 星期二	Fujian Longxi Bearing (Group) Co., Ltd	FLB(G)CL	Lu Tongxin	LT	总
2017/8/14 星期一	Beihang University	BU	The 15th Research Institute of China Electronics Technology Group Corporation Corporation	TRICETGCC	总
2017/6/29 星期四	Beijing Aerospace Automatic Control Research Institute	BAACRI	China Academy of Launch Vehicle Technology	CALVT	总
2017/7/13 星期四	Capital Aerospace Machinery Company	CAMC	China Academy of Launch Vehicle Technology	CALVT	总
2017/11/10 星期五	Beijing Aerospace Automatic Control Research Institute	BAACRI	China Academy of Launch Vehicle Technology	CALVT	总
2017/9/15 星期五	Beijing Aerospace Automatic Control Research Institute	BAACRI	China Academy of Launch Vehicle Technology	CALVT	总
2017/4/18 星期二	Beijing Aerospace Automatic Control Research Institute	BAACRI	China Academy of Launch Vehicle Technology	CALVT	总
2017/12/15 星期五	Beijing Aerospace Automatic Control Research Institute	BAACRI	China Academy of Launch Vehicle Technology	CALVT	总
2017/12/15 星期五	Beijing Aerospace Automatic Control Research Institute	BAACRI	China Academy of Launch Vehicle Technology	CALVT	总
2017/8/15 星期二	Beijing Aerospace Automatic Control Research Institute	BAACRI	China Academy of Launch Vehicle Technology	CALVT	总
2017/4/11 星期二	North University of China	NUC	China South Industries Group North Industries Research Institute	CSIGNIRI	总
2017/6/29 星期四	Beijing Aerospace Automatic Control Research Institute	BAACRI	China Academy of Launch Vehicle Technology	CALVT	总
2017/9/15 星期五	Beijing Aerospace Automatic Control Research Institute	BAACRI	China Academy of Launch Vehicle Technology	CALVT	总
2017/6/29 星期四	Aerospace Materials and Technology Research Institute	AMTRI	China Academy of Launch Vehicle Technology	CALVT	总
2017/5/2 星期二	Beijing Aerospace Automatic Control Research Institute	BAACRI	China Academy of Launch Vehicle Technology	CALVT	总
2017/6/15 星期四	Beijing Aerospace Long March Aircraft Research Institute	BALMARI	China Academy of Launch Vehicle Technology	CALVT	总
2017/1/24 星期二	Beihang University	BU	The Second Research Institute of the Second Artillery Equipment Research Institute of the People's Liberation Army	TSRISAERIPLA	总
2017/5/30 星期二	The 36th Research Institute of China Electronics Technology Group Corporation Corporation	TRICETGCC	Equipment Overall Demonstration Institute of People's Liberation Army Air Force Equipment Research Institute	EODIPLAAFERI	总
2017/12/15 星期五	Beijing Institute of Technology	BIT	Luzhou North Chemical Industry Co., Ltd	LNCICL	总
2017/10/17 星期二	Beijing Aerospace Long March Aircraft Research Institute	BALMARI	China Academy of Launch Vehicle Technology	CALVT	总
2017/4/11 星期二	Beijing Aerospace Long March Aircraft Research Institute	BALMARI	China Academy of Launch Vehicle Technology	CALVT	总
2017/4/18 星期二	Beijing Aerospace Long March Aircraft Research Institute	BALMARI	China Academy of Launch Vehicle Technology	CALVT	总
2017/9/28 星期四	The First Affiliated Hospital of the Third Military Medical University of the People's Liberation Army	TFAHTMMUPLA	Chongqing Zhi'en Pharmaceutical Co., Ltd	CZPCL	总
2016/12/13 星期二	Beijing Aerospace Long March Aircraft Research Institute	BALMARI	China Academy of Launch Vehicle Technology	CALVT	总
2017/8/15 星期二	Beihang University	BU	The 15th Research Institute of China Electronics Technology Group Corporation Corporation	TRICETGCC	总
2017/10/17 星期二	Beihang University	BU	The 15th Research Institute of China Electronics Technology Group Corporation Corporation	TRICETGCC	总
2017/12/15 星期五	Nanjing Panda Handa Technology Co., Ltd	NPHTCL	Panda Electronics Group Co., Ltd	PEGCL	总
2017/11/28 星期二	Shanghai Aerospace Electronics Co., Ltd	SAECL	Shanghai Scientific Instrument Factory	SSIF	总
2016/9/6 星期二	Aerospace Changping Technology Co., Ltd	ACTCL	People's Liberation Army Logistics Engineering College	PLALEC	总
2017/1/24 星期二	Ordnance Technology Research Institute of People's Liberation Army General Armaments Department	OTRIPLAGAD	Nanjing University of Science and Technology	NUST	总
2017/6/15 星期四	Naval Equipment Research Institute of the People's Liberation Army Navy	NERIPLAN	The 10th Research Institute of China Electronics Technology Group Corporation Corporation	TRICETGCC	总
2016/12/27 星期二	People's Liberation Army Logistics Engineering College	PLALEC	Aerospace Changping Technology Co., Ltd	ACTCL	总
2017/5/16 星期二	Naval Equipment Research Institute of the People's Liberation Army Navy	NERIPLAN	The 10th Research Institute of China Electronics Technology Group Corporation Corporation	TRICETGCC	总
2017/8/15 星期二	Aeronautics College of the People's Liberation Army Navy Navy	ACPLANN	The Third Overall Design Department of China Aerospace Science and Industry Corporation	TTODDCASIC	总
2017/6/29 星期四	63928 unit of the People's Liberation Army	PLA	Beijing University of Posts and Telecommunications	BUPT	总
2017/8/15 星期二	Beijing Aerospace Automatic Control Research Institute	BAACRI	China Academy of Launch Vehicle Technology	CALVT	总
2017/9/15 星期五	Gansu Yinguang Chemical Industry Group Co., Ltd	GYCIGCL	Beijing Institute of Technology	BIT	总
2017/9/29 星期五	Changzhou Saiying Optical Materials Co., Ltd	CSOMCL	Institute of Radiation and Radiation Medicine, Academy of Military Medical Sciences, People's Liberation Army	IRRMAMMSPLA	总
2017/7/13 星期四	China Ordnance Industry 203 Research Institute	COIRI	Xi'an Guiding Technology Co., Ltd	XGTCL	总
2017/7/13 星期四	China Ordnance Industry 203 Research Institute	COIRI	Xi'an Guiding Technology Co., Ltd	XGTCL	总
2017/3/14 星期二	China Ordnance Industry 203 Research Institute	COIRI	Xi'an Guiding Technology Co., Ltd	XGTCL	总
2017/7/28 星期五	Beijing Institute of Technology	BIT	Shanxi North Xing'an Chemical Industry Co., Ltd	SNXCICL	总
2017/2/14 星期二	Tongji University	TU	Dongguan Tongji University Research Institute	DTURI	总
2017/6/15 星期四	Aerospace Materials and Technology Research Institute	AMTRI	China Academy of Launch Vehicle Technology	CALVT	总
2017/11/28 星期二	Aviation Industry Corporation of China Beijing Institute of Aeronautical Materials	AICCBIAM	Aviation Industry Corporation of China Shenyang Aircraft Design and Research Institute	AICCSADRI	总
2017/9/29 星期五	Aviation Industry Corporation of China Xi'an Institute of Aeronautical Computing Technology	AICCXIACT	Northwestern Polytechnical University	NPU	总
2017/2/14 星期二	Shandong Special Industry Group Co., Ltd	SSIGCL	China Ordnance Industry 52nd Research Institute	COIRI	总
2017/4/11 星期二	Aviation Industry Corporation of China Xi'an Institute of Aeronautical Computing Technology	AICCXIACT	Northwestern Polytechnical University	NPU	总
2017/8/15 星期二	Aerospace Materials and Technology Research Institute	AMTRI	China Academy of Launch Vehicle Technology	CALVT	总
2017/4/11 星期二	The 20th Research Institute of China Electronics Technology Group Corporation Corporation	TRICETGCC	Beijing Institute of Technology	BIT	总
2017/6/15 星期四	Shanghai Institute of Mechanical and Electrical Engineering	SIMEE	Shanghai Materials Research Institute	SMRI	总
2017/7/13 星期四	Shanghai Aerospace Precision Machinery Research Institute	SAPMRI	Shanghai Jiao Tong University	SJTU	总
2017/6/15 星期四	Beijing Zhuoyue Taikun Technology Co., Ltd	BZTTCL	People's Liberation Army Armoured reconnaissance Engineering College	PLAAEC	总
2017/6/15 星期四	Beijing Zhuoyue Taikun Technology Co., Ltd	BZTTCL	People's Liberation Army Armoured reconnaissance Engineering College	PLAAEC	总
2017/6/15 星期四	Beijing Zhuoyue Taikun Technology Co., Ltd	BZTTCL	People's Liberation Army Armoured reconnaissance Engineering College	PLAAEC	总
2017/4/18 星期二	Institute of Information Engineering, Chinese Academy of Sciences	IIECAS	National Computer Network and Information Security Management Center	NCNISMC	总
2017/4/18 星期二	Aerospace Materials and Technology Research Institute	AMTRI	China Academy of Launch Vehicle Technology	CALVT	总
2017/2/28 星期二	Beijing Aerospace Automatic Control Research Institute	BAACRI	China Academy of Launch Vehicle Technology	CALVT	总
2017/1/10 星期二	Beijing Aerospace Automatic Control Research Institute	BAACRI	China Academy of Launch Vehicle Technology	CALVT	总
2017/5/2 星期二	Beijing Aerospace Long March Aircraft Research Institute	BALMARI	China Academy of Launch Vehicle Technology	CALVT	总
2017/8/15 星期二	Aerospace Materials and Technology Research Institute	AMTRI	China Academy of Launch Vehicle Technology	CALVT	总
2017/8/15 星期二	Beijing Telemetry Technology Research Institute	BTTRI	Beijing Institute of Tracking and Communication Technology	BITCT	总
2017/4/18 星期二	Aerospace Materials and Technology Research Institute	AMTRI	China Academy of Launch Vehicle Technology	CALVT	总
2017/1/24 星期二	Xidian University	XU	Xi'an Fenghuo Electronic Technology Co., Ltd	XFETCL	总
2017/5/16 星期二	Shenyang Aerospace University	SAU	Dalian University of Technology	DUT	总
2017/4/18 星期二	Xidian University	XU	Xi'an Fenghuo Electronic Technology Co., Ltd	XFETCL	总
2016/9/20 星期二	Beijing Guanzhong Jichuang Technology Co., Ltd	BGJTCL	Aeronautics College of the People's Liberation Army Navy Navy	ACPLANN	总
2017/1/24 星期二	General Equipment Department Nanjing Military Representative Office in Yangzhou Region Military Representative Office	GEDNMROYRMRO	Jiangsu Baoke Electronics Co., Ltd	JBECL	总
2017/4/18 星期二	People's Liberation Army Logistics Engineering College	PLALEC	Weihai Yingdun Special Engineering Materials Co., Ltd	WYSEMCL	总
2017/3/14 星期二	People's Liberation Army Logistics Engineering College	PLALEC	Weihai Yingdun Special Engineering Materials Co., Ltd	WYSEMCL	总
2017/4/18 星期二	People's Liberation Army Logistics Engineering College	PLALEC	Weihai Yingdun Special Engineering Materials Co., Ltd	WYSEMCL	总
2017/3/14 星期二	People's Liberation Army Logistics Engineering College	PLALEC	Weihai Yingdun Special Engineering Materials Co., Ltd	WYSEMCL	总
2017/3/14 星期二	People's Liberation Army Logistics Engineering College	PLALEC	Weihai Yingdun Special Engineering Materials Co., Ltd	WYSEMCL	总
2017/4/19 星期三	Beijing Aerospace Long March Aircraft Research Institute	BALMARI	China Academy of Launch Vehicle Technology	CALVT	总
2017/2/28 星期二	Shanghai Aerospace Electronic Communication Equipment Research Institute	SAECERI	Naval Engineering University	NEU	总
2017/2/14 星期二	Beijing Aerospace Long March Aircraft Research Institute	BALMARI	China Academy of Launch Vehicle Technology	CALVT	总
2016/9/20 星期二	Aerospace Materials and Technology Research Institute	AMTRI	China Academy of Launch Vehicle Technology	CALVT	总
2017/12/15 星期五	Ship Demonstration Institute of People's Liberation Army Navy Equipment Research Institute	SDIPLANERI	Shanghai Jiao Tong University	SJTU	总
2017/12/15 星期五	Ship Demonstration Institute of People's Liberation Army Navy Equipment Research Institute	SDIPLANERI	Shanghai Jiao Tong University	SJTU	总
2017/12/15 星期五	Ship Demonstration Institute of People's Liberation Army Navy Equipment Research Institute	SDIPLANERI	Shanghai Jiao Tong University	SJTU	总
2017/12/15 星期五	Ship Demonstration Institute of People's Liberation Army Navy Equipment Research Institute	SDIPLANERI	Shanghai Jiao Tong University	SJTU	总
2017/5/31 星期三	Beijing Aerospace Long March Aircraft Research Institute	BALMARI	China Academy of Launch Vehicle Technology	CALVT	总
2017/2/28 星期二	Beijing Aerospace Automatic Control Research Institute	BAACRI	China Academy of Launch Vehicle Technology	CALVT	总
2017/1/24 星期二	Aerospace Materials and Technology Research Institute	AMTRI	China Academy of Launch Vehicle Technology	CALVT	总
2017/9/15 星期五	State owned 844 Factory	SF	Anjieli Electronic Technology (Suzhou) Co., Ltd	AET(S)CL	总
2017/9/29 星期五	Anjieli Electronic Technology (Suzhou) Co., Ltd	AET(S)CL	State owned 844 Factory	SF	总
2017/2/14 星期二	Beijing Aerospace Long March Aircraft Research Institute	BALMARI	China Academy of Launch Vehicle Technology	CALVT	总
2017/3/14 星期二	Beijing Aerospace Long March Aircraft Research Institute	BALMARI	China Academy of Launch Vehicle Technology	CALVT	总
2017/1/10 星期二	Aerospace Materials and Technology Research Institute	AMTRI	China Academy of Launch Vehicle Technology	CALVT	总
2017/1/10 星期二	Aerospace Materials and Technology Research Institute	AMTRI	China Academy of Launch Vehicle Technology	CALVT	总
2017/10/17 星期二	China Ordnance Industry 203 Research Institute	COIRI	Xi'an Guiding Technology Co., Ltd	XGTCL	总
2017/6/30 星期五	Beijing Aerospace Automatic Control Research Institute	BAACRI	China Academy of Launch Vehicle Technology	CALVT	总
2017/1/10 星期二	General Research Institute for Nonferrous Metals	GRINM	Youyan Yijin New Materials Co., Ltd	YYNMCL	总
2016/7/12 星期二	Beijing Aerospace Automatic Control Research Institute	BAACRI	China Academy of Launch Vehicle Technology	CALVT	总
2016/9/20 星期二	Aerospace Materials and Technology Research Institute	AMTRI	China Academy of Launch Vehicle Technology	CALVT	总
2016/6/21 星期二	Beijing Aerospace Automatic Control Research Institute	BAACRI	China Academy of Launch Vehicle Technology	CALVT	总
2017/8/15 星期二	Beijing Aerospace Automatic Control Research Institute	BAACRI	China Academy of Launch Vehicle Technology	CALVT	总
2017/8/15 星期二	Beijing Aerospace Automatic Control Research Institute	BAACRI	China Academy of Launch Vehicle Technology	CALVT	总
2016/11/1 星期二	Beijing Aerospace Automatic Control Research Institute	BAACRI	China Academy of Launch Vehicle Technology	CALVT	总
2017/2/28 星期二	Beijing Aerospace Long March Aircraft Research Institute	BALMARI	China Academy of Launch Vehicle Technology	CALVT	总
2016/11/1 星期二	Beijing Aerospace Automatic Control Research Institute	BAACRI	China Academy of Launch Vehicle Technology	CALVT	总
2016/9/20 星期二	Beijing Aerospace Automatic Control Research Institute	BAACRI	China Academy of Launch Vehicle Technology	CALVT	总
2016/11/1 星期二	Beijing Aerospace Automatic Control Research Institute	BAACRI	China Academy of Launch Vehicle Technology	CALVT	总
2016/6/21 星期二	Beijing Aerospace Automatic Control Research Institute	BAACRI	China Academy of Launch Vehicle Technology	CALVT	总
2016/6/21 星期二	Beijing Aerospace Automatic Control Research Institute	BAACRI	China Academy of Launch Vehicle Technology	CALVT	总
2017/7/28 星期五	China Ordnance Industry Navigation and Control Technology Research Institute	COINCTRI	China North Industrial Corporation	CNIC	总
2017/6/16 星期五	The 32nd Research Institute of China Electronics Technology Group Corporation Corporation	TRICETGCC	The 61st Research Institute of the General Staff of the People's Liberation Army General Staff Department	TRIGSPLAGSD	总
2016/11/15 星期二	Beijing Aerospace Long March Aircraft Research Institute	BALMARI	China Academy of Launch Vehicle Technology	CALVT	总
2016/7/12 星期二	Beijing Aerospace Automatic Control Research Institute	BAACRI	China Academy of Launch Vehicle Technology	CALVT	总
2016/12/27 星期二	Beijing Institute of Technology	BIT	Beijing Information Science&Technology University	BISTU	总
2017/2/14 星期二	Aerospace Materials and Technology Research Institute	AMTRI	China Academy of Launch Vehicle Technology	CALVT	总
2017/1/24 星期二	People's Liberation Army University of Science and Technology	PLAUST	The 28th Research Institute of China Electronics Technology Group Corporation Corporation	TRICETGCC	总
2017/2/14 星期二	Aerospace Materials and Technology Research Institute	AMTRI	China Academy of Launch Vehicle Technology	CALVT	总
2016/6/21 星期二	Beijing Aerospace Automatic Control Research Institute	BAACRI	China Academy of Launch Vehicle Technology	CALVT	总
2016/6/21 星期二	Beijing Aerospace Automatic Control Research Institute	BAACRI	China Academy of Launch Vehicle Technology	CALVT	总
2016/11/15 星期二	Beijing Aerospace Automatic Control Research Institute	BAACRI	China Academy of Launch Vehicle Technology	CALVT	总
2016/8/16 星期二	Beijing Aerospace Automatic Control Research Institute	BAACRI	China Academy of Launch Vehicle Technology	CALVT	总
2017/1/10 星期二	Aerospace Materials and Technology Research Institute	AMTRI	China Academy of Launch Vehicle Technology	CALVT	总
2016/8/16 星期二	Beijing Aerospace Automatic Control Research Institute	BAACRI	China Academy of Launch Vehicle Technology	CALVT	总
2016/8/16 星期二	Aerospace Materials and Technology Research Institute	AMTRI	China Academy of Launch Vehicle Technology	CALVT	总
2016/12/13 星期二	Military Representative Office of the Chemical Defense Military Representative Bureau of the General Equipment Department in Wuhan Region	MROCDMRBGEDWR	Xinxiang Taihang Power Equipment Co., Ltd	XTPECL	总
2017/1/10 星期二	Beijing Aerospace Automatic Control Research Institute	BAACRI	China Academy of Launch Vehicle Technology	CALVT	总
2017/6/30 星期五	Xinxiang Taihang Power Equipment Co., Ltd	XTPECL	Military Representative Office of the Chemical Defense Military Representative Bureau of the General Equipment Department in Wuhan Region	MROCDMRBGEDWR	总
2016/11/1 星期二	Beijing Aerospace Automatic Control Research Institute	BAACRI	China Academy of Launch Vehicle Technology	CALVT	总
2017/1/10 星期二	Beijing Aerospace Automatic Control Research Institute	BAACRI	China Academy of Launch Vehicle Technology	CALVT	总
2016/11/1 星期二	Beijing Aerospace Automatic Control Research Institute	BAACRI	China Academy of Launch Vehicle Technology	CALVT	总
2017/4/12 星期三	Beijing Aerospace Long March Aircraft Research Institute	BALMARI	China Academy of Launch Vehicle Technology	CALVT	总
2017/6/16 星期五	Unit 91655 of People's Liberation Army	UPLA	Institute of Computing Technology, Chinese Academy of Sciences	ICTCAS	总
2017/1/10 星期二	Unit 91655 of People's Liberation Army	UPLA	China Electronics Marine Information Technology Research Institute Co., Ltd	CEMITRICL	总
2016/8/2 星期二	63620 troops of the People's Liberation Army	PLA	Shanghai Jiao Tong University	SJTU	总
2016/10/4 星期二	63620 troops of the People's Liberation Army	PLA	Shanghai Jiao Tong University	SJTU	总
2016/10/4 星期二	63620 troops of the People's Liberation Army	PLA	Shanghai Jiao Tong University	SJTU	总
2016/10/4 星期二	63620 troops of the People's Liberation Army	PLA	Shanghai Jiao Tong University	SJTU	总
2016/11/1 星期二	Beijing Aerospace Long March Aircraft Research Institute	BALMARI	China Academy of Launch Vehicle Technology	CALVT	总
2017/1/10 星期二	Aerospace Materials and Technology Research Institute	AMTRI	China Academy of Launch Vehicle Technology	CALVT	总
2017/1/10 星期二	Aerospace Materials and Technology Research Institute	AMTRI	China Academy of Launch Vehicle Technology	CALVT	总
2017/4/19 星期三	Aerospace Materials and Technology Research Institute	AMTRI	China Academy of Launch Vehicle Technology	CALVT	总
2016/6/21 星期二	Beijing Aerospace Automatic Control Research Institute	BAACRI	China Academy of Launch Vehicle Technology	CALVT	总
2017/1/10 星期二	Beijing Aerospace Long March Aircraft Research Institute	BALMARI	China Academy of Launch Vehicle Technology	CALVT	总
2017/6/30 星期五	Beijing Aerospace Systems Engineering Research Institute	BASERI	China Academy of Launch Vehicle Technology	CALVT	总
2016/8/16 星期二	Beijing Aerospace Long March Aircraft Research Institute	BALMARI	China Academy of Launch Vehicle Technology	CALVT	总
2016/6/21 星期二	Beijing Aerospace Long March Aircraft Research Institute	BALMARI	China Academy of Launch Vehicle Technology	CALVT	总
2016/3/15 星期二	Beijing Aerospace Long March Aircraft Research Institute	BALMARI	China Academy of Launch Vehicle Technology	CALVT	总
2016/9/20 星期二	Beijing Aerospace Long March Aircraft Research Institute	BALMARI	China Academy of Launch Vehicle Technology	CALVT	总
2016/3/15 星期二	Beijing Aerospace Long March Aircraft Research Institute	BALMARI	China Academy of Launch Vehicle Technology	CALVT	总
2016/6/21 星期二	Beijing Aerospace Long March Aircraft Research Institute	BALMARI	China Academy of Launch Vehicle Technology	CALVT	总
2017/10/16 星期一	Beijing Aerospace Long March Aircraft Research Institute	BALMARI	China Academy of Launch Vehicle Technology	CALVT	总
2016/3/15 星期二	Beijing Aerospace Long March Aircraft Research Institute	BALMARI	China Academy of Launch Vehicle Technology	CALVT	总
2017/8/15 星期二	Aerospace Materials and Technology Research Institute	AMTRI	China Academy of Launch Vehicle Technology	CALVT	总
2016/3/15 星期二	Aerospace Materials and Technology Research Institute	AMTRI	China Academy of Launch Vehicle Technology	CALVT	总
2016/3/15 星期二	Aerospace Materials and Technology Research Institute	AMTRI	China Academy of Launch Vehicle Technology	CALVT	总
2016/6/21 星期二	Aerospace Materials and Technology Research Institute	AMTRI	China Academy of Launch Vehicle Technology	CALVT	总
2016/6/21 星期二	Aerospace Materials and Technology Research Institute	AMTRI	China Academy of Launch Vehicle Technology	CALVT	总
2017/8/15 星期二	Aerospace Materials and Technology Research Institute	AMTRI	China Academy of Launch Vehicle Technology	CALVT	总
2016/11/1 星期二	Dalian University of Technology	DUT	Dalian Naval Academy of the PLA	DNAPLA	总
2017/9/29 星期五	Changzhi Tsinghua Machinery Factory	CTMF	China Academy of Launch Vehicle Technology	CALVT	总
2017/4/12 星期三	Changzhi Tsinghua Machinery Factory	CTMF	China Academy of Launch Vehicle Technology	CALVT	总
2017/6/16 星期五	The 54th Research Institute of China Electronics Technology Group Corporation Corporation	TRICETGCC	Beijing University of Posts and Telecommunications	BUPT	总
2017/6/16 星期五	The 54th Research Institute of China Electronics Technology Group Corporation Corporation	TRICETGCC	Beijing University of Posts and Telecommunications	BUPT	总
2017/11/28 星期二	The Third Research Institute of the Second Artillery Equipment Research Institute of the People's Liberation Army	TTRISAERIPLA	Hunan Aerospace Electromechanical Equipment and Special Materials Research Institute	HAEESMRI	总
2017/7/28 星期五	Beijing Aerospace Automatic Control Research Institute	BAACRI	China Academy of Launch Vehicle Technology	CALVT	总
2017/11/28 星期二	People's Liberation Army 63983 Unit	PLAU	Beijing Zhongke Feihong Technology Co., Ltd	BZFTCL	总
2017/5/17 星期三	715 Research Institute of China Shipbuilding Industry Corporation	RICSIC	Guangzhou Huagong Baichuan Technology Co., Ltd	GHBTCL	总
2017/7/14 星期五	China Ordnance Industry 52nd Research Institute	COIRI	Armoured reconnaissance Equipment Technology Research Institute of People's Liberation Army General Armaments Department	AETRIPLAGAD	总
2017/7/13 星期四	China Ordnance Industry 52nd Research Institute	COIRI	Armoured reconnaissance Equipment Technology Research Institute of People's Liberation Army General Armaments Department	AETRIPLAGAD	总
2017/4/12 星期三	Beijing Institute of Technology	BIT	Beijing Zhongyu Xintai Technology Development Co., Ltd	BZXTDCL	总
2017/10/17 星期二	Beijing Institute of Near Space Vehicle Systems Engineering	BINSVSE	China Academy of Launch Vehicle Technology	CALVT	总
2015/8/5 星期三	Unit 32215 of People's Liberation Army	UPLA	Jilin University	JU	总
2015/5/27 星期三	Chemical Defense Research Institute of the People's Liberation Army Academy of Military Sciences	CDRIPLAAMS	Institute of Industrial Ecology and Environment, Zhejiang University	IIEEZU	总
2015/5/20 星期三	Zhejiang Sci-Tech University	ZSTU	Beijing Institute of Mechanical and Electrical Engineering	BIMEE	总
2014/6/11 星期三	Beijing Graphics Research Institute	BGRI	The 54th Research Institute of China Electronics Technology Group Corporation Corporation	TRICETGCC	总
2014/7/23 星期三	Beijing Precision Electromechanical Control Equipment Research Institute	BPECERI	China Academy of Launch Vehicle Technology	CALVT	总
2014/9/3 星期三	Xidian University	XU	Air Force Engineering University	AFEU	总
2013/12/4 星期三	Military Representative Office of the People's Liberation Army in No. 127 Factory	MROPLANF	Qiqihar North Machinery Co., Ltd	QNMCL	总
2014/10/22 星期三	Beijing Telemetry Technology Research Institute	BTTRI	Aerospace Long March Rocket Technology Co., Ltd	ALMRTCL	总
2013/9/11 星期三	The 704 Research Institute of China Shipbuilding Industry Corporation	TRICSIC	Ship Demonstration Institute of People's Liberation Army Navy Equipment Research Institute	SDIPLANERI	总
2014/7/16 星期三	The 704 Research Institute of China Shipbuilding Industry Corporation	TRICSIC	Ship Demonstration Institute of People's Liberation Army Navy Equipment Research Institute	SDIPLANERI	总
2014/7/16 星期三	The 704 Research Institute of China Shipbuilding Industry Corporation	TRICSIC	Ship Demonstration Institute of People's Liberation Army Navy Equipment Research Institute	SDIPLANERI	总
2014/3/5 星期三	Beijing Precision Electromechanical Control Equipment Research Institute	BPECERI	China Academy of Launch Vehicle Technology	CALVT	总
2014/4/2 星期三	China Academy of Launch Vehicle Technology	CALVT	Beijing Precision Electromechanical Control Equipment Research Institute	BPECERI	总
2014/7/23 星期三	Beijing Precision Electromechanical Control Equipment Research Institute	BPECERI	China Academy of Launch Vehicle Technology	CALVT	总
2014/3/19 星期三	Chengdu Aircraft Industry (Group) Co., Ltd	CAI(G)CL	Nanchang Hangkong University	NHU	总
2013/12/25 星期三	China Electronics Technology Standardization Research Institute	CETSRI	Xidian University	XU	总
2013/12/25 星期三	China Electronics Technology Standardization Research Institute	CETSRI	Xidian University	XU	总
2014/1/8 星期三	China Electronics Technology Standardization Research Institute	CETSRI	Beihang University	BU	总
2014/1/8 星期三	China Electronics Technology Standardization Research Institute	CETSRI	Beihang University	BU	总
2013/10/23 星期三	Nankai University	NU	Beijing Space Electromechanical Research Institute	BSERI	总
2013/10/30 星期三	Jiangsu Haiming Medical Equipment Co., Ltd	JHMECL	723 Research Institute of China Shipbuilding Industry Corporation	RICSIC	总
2013/10/30 星期三	Jiangsu Haiming Medical Equipment Co., Ltd	JHMECL	723 Research Institute of China Shipbuilding Industry Corporation	RICSIC	总
2014/7/23 星期三	China Electronic Equipment System Engineering Corporation	CEESEC	Beijing Weier Ruichuang Technology Co., Ltd	BWRTCL	总
2014/4/2 星期三	China Academy of Launch Vehicle Technology	CALVT	Beijing Precision Electromechanical Control Equipment Research Institute	BPECERI	总
2014/2/26 星期三	The 22nd Research Institute of China Electronics Technology Group Corporation Corporation	TRICETGCC	China Electronic Equipment System Engineering Corporation	CEESEC	总
2013/7/10 星期三	Shanghai Institute of Silicate, Chinese Academy of Sciences	SISCAS	Dalian Jinma Boron Industry Technology Group Co., Ltd	DJBITGCL	总
2021/10/19 星期二	Shanghai Institute of Silicate, Chinese Academy of Sciences	SISCAS	Dalian Jinma Boron Industry Technology Group Co., Ltd	DJBITGCL	总
2013/7/3 星期三	Jiangsu Haiming Medical Equipment Co., Ltd	JHMECL	723 Research Institute of China Shipbuilding Industry Corporation	RICSIC	总
2013/11/27 星期三	Jiangsu Haiming Medical Equipment Co., Ltd	JHMECL	723 Research Institute of China Shipbuilding Industry Corporation	RICSIC	总
2013/10/30 星期三	Jiangsu Haiming Medical Equipment Co., Ltd	JHMECL	723 Research Institute of China Shipbuilding Industry Corporation	RICSIC	总
2012/1/18 星期三	Northwest Nonferrous Metals Research Institute	NNMRI	Liaoning University of Technology	LUT	总
2012/1/18 星期三	Northwest Nonferrous Metals Research Institute	NNMRI	Liaoning University of Technology	LUT	总
2013/8/28 星期三	People's Liberation Army National University of Defense Science and Technology	PLANUDST	Nanjing Keruida Electronic Equipment Co., Ltd	NKEECL	总
2012/10/31 星期三	Shanghai Institute of Space Propulsion	SISP	Nanjing Zhongxu Electronic Technology Co., Ltd	NZETCL	总
2013/1/2 星期三	Aviation Industry Corporation of China Leihua Electronic Technology Research Institute	AICCLETRI	State owned 154 Factory	SF	总
2012/10/31 星期三	Shanghai Institute of Space Propulsion	SISP	Nanjing Zhongxu Electronic Technology Co., Ltd	NZETCL	总
2011/5/10 星期二	Northwest Nuclear Technology Research Institute	NNTRI	Guangyuan Liyuan Radio Equipment Industry Co., Ltd	GLREICL	总
2011/6/21 星期二	Northwestern Polytechnical University	NPU	China Ordnance Industry 204 Research Institute	COIRI	总
2012/11/28 星期三	Hudong–Zhonghua Shipbuilding (Group) Co., Ltd	HZS(G)CL	Wuxi Shenxi Shipbuilding Equipment Factory	WSSEF	总
2009/6/30 星期二	92537 unit of People's Liberation Army	PLA	Rizhao Hatton Plasma electrolytic oxidation Co., Ltd	RHPCL	总
2009/6/30 星期二	92537 unit of People's Liberation Army	PLA	Rizhao Hatton Plasma electrolytic oxidation Co., Ltd	RHPCL	总
2011/6/1 星期三	Shanghai Institute of Space Propulsion	SISP	Xuzhou Combustion Control Research Institute Co., Ltd	XCCRICL	总
2012/2/8 星期三	Shanghai Satellite Engineering Research Institute	SSERI	Shanghai Satellite Equipment Research Institute	SSERI	总
2008/2/27 星期三	Ship Demonstration Institute of People's Liberation Army Navy Equipment Research Institute	SDIPLANERI	Wuxi Wotai Technology Development Co., Ltd	WWTDCL	总
2009/12/16 星期三	Oil Training Brigade of Beijing Military Region of the People's Liberation Army	OTBBMRPLA	Quartermaster Supplies and Fuel Department of the Joint Service Department of the Beijing Military Region of the People's Liberation Army	QSFDJSDBMRPLA	总
2012/10/2 星期二	Northwestern Polytechnical University	NPU	Shanxi Pingyang Heavy Industry Machinery Co., Ltd	SPHIMCL	总
2011/10/19 星期三	Southwest Jiaotong University	SJU	Chengdu Jiaotong University Jingyu Technology Co., Ltd	CJUJTCL	总
2009/4/28 星期二	Northwestern Polytechnical University	NPU	Xi'an Aerospace Engine Factory	XAEF	总
2009/9/9 星期三	Nanjing University of Aeronautics and Astronautics	NUAA	Harbin Electric Machinery Factory Co., Ltd	HEMFCL	总
2010/2/16 星期二	Beihang University	BU	People's Liberation Army Navy Equipment Research Institute	PLANERI	总
2009/4/28 星期二	Bengbu Shenzhou Machinery Co., Ltd	BSMCL	People's Liberation Army 63983 Unit	PLAU	总
2008/10/14 星期二	Unit 66065 of the People's Liberation Army	UPLA	State owned 446 Factory	SF	总
2010/8/4 星期三	Shanghai Satellite Engineering Research Institute	SSERI	Shanghai Satellite Equipment Research Institute	SSERI	总
2009/12/15 星期二	Panda Electronics Group Co., Ltd	PEGCL	Nanjing Panda Electronics Co., Ltd	NPECL	总
2009/7/29 星期三	National Astronomical Observatories of China, Chinese Academy of Sciences	NAOCCAS	National Time Service Center of the Chinese Academy of Sciences	NTSCCAS	总
2011/1/11 星期二	Panda Electronics Group Co., Ltd	PEGCL	Nanjing Panda Electronics Co., Ltd	NPECL	总
2009/12/15 星期二	Panda Electronics Group Co., Ltd	PEGCL	Nanjing Panda Electronics Co., Ltd	NPECL	总
2008/7/30 星期三	Northwest Nonferrous Metals Research Institute	NNMRI	Northwestern Polytechnical University	NPU	总
2016/10/5 星期三	Ship Demonstration Institute of People's Liberation Army Navy Equipment Research Institute	SDIPLANERI	Northwestern Polytechnical University	NPU	总
2012/11/27 星期二	Beihang University	BU	Institute of Microbiology, Chinese Academy of Sciences	IMCAS	总
2006/7/4 星期二	National Time Service Center of the Chinese Academy of Sciences	NTSCCAS	National Astronomical Observatories of China, Chinese Academy of Sciences	NAOCCAS	总
2004/12/7 星期二	Engineering Research and Design Institute of Guangzhou Military Region of the People's Liberation Army	ERDIGMRPLA	China Yaohua Glass Group Qinhuangdao Yaohua Fiberglass Factory	CYGGQYFF	总
2007/1/23 星期二	Northwestern Polytechnical University	NPU	Baoji Rare Metal Equipment Design and Development Institute	BRMEDDI	总
2010/9/7 星期二	Beihang University	BU	Beijing University of Technology	BUT	总
2004/1/20 星期二	Engineering Research and Design Institute of Guangzhou Military Region of the People's Liberation Army	ERDIGMRPLA	Nanjing Nangong Mining and Metallurgy Special Equipment Manufacturing Co., Ltd	NNMMSEMCL	总
2002/7/21 星期日	Engineering Research and Design Institute of Guangzhou Military Region of the People's Liberation Army	ERDIGMRPLA	Nanjing Nangong Mining and Metallurgy Special Equipment Manufacturing Co., Ltd	NNMMSEMCL	总
2006/7/4 星期二	Beijing Institute of Technology	BIT	The 54th Research Institute of the General Staff of the People's Liberation Army General Staff Department	TRIGSPLAGSD	总
2001/1/6 星期六	People's Liberation Army Chongqing Police Area	PLACPA	Beida Jade Bird Universal Sci-Tech Co., Ltd	BJBUSTCL	总
2002/9/2 星期一	Nanjing University of Science and Technology	NUST	Anhui Dongfeng Machinery Factory	ADMF	总
2002/8/13 星期二	Beijing Institute of Technology	BIT	China North Industrial Corporation	CNIC	总
2000/9/18 星期一	People's Liberation Army Armoured reconnaissance Engineering College	PLAAEC	Zhongjing Asset Management Co., Ltd	ZAMCL	总
2000/7/31 星期一	Guangzhou Military Region Engineering Research and Design Institute	GMRERDI	Hubei Huazhou Co., Ltd	HHCL	总
1999/6/1 星期二	Guangzhou Military Region Engineering Research and Design Institute	GMRERDI	China Yaohua Glass Group Qinhuangdao Yaohua Fiberglass Factory	CYGGQYFF	总
1999/3/4 星期四	Hefei Institutes of Physical Science, Chinese Academy of Sciences	HIPSCAS	Anhui Provincial Department of Public Security	APDPS	总
2000/3/24 星期五	Hefei Institutes of Physical Science, Chinese Academy of Sciences	HIPSCAS	Anhui Provincial Department of National Security	APDNS	总
1998/2/11 星期三	Chinese Astronaut Research and Training Center	CARTC	Beijing Haiying Plastic arts Design Center	BHPDC	总
1998/4/18 星期六	92609 unit of People's Liberation Army	PLA	Institute of Polymer chemistry, Nankai University	IPNU	总
1995/6/20 星期二	Guangzhou Military Region Engineering Research and Design Institute	GMRERDI	State owned 9603 Factory	SF	总
1995/6/20 星期二	Guangzhou Military Region Engineering Research and Design Institute	GMRERDI	State owned 9603 Factory	SF	总
1995/6/20 星期二	Guangzhou Military Region Engineering Research and Design Institute	GMRERDI	State owned 9603 Factory	SF	总
1994/12/12 星期一	Guangzhou Military Region Engineering Research and Design Institute	GMRERDI	Qinhuangdao Yaohua Fiberglass Factory	QYFF	总
1999/3/15 星期一	Beijing Institute of Technology	BIT	152 Factory of China Ordnance Industry Corporation	FCOIC	总
1997/5/18 星期日	China Ordnance Industry 203 Research Institute	COIRI	State owned 556th Factory	SF	总
1996/8/11 星期日	Northwestern Polytechnical University	NPU	Military Representative Office of the Navy in Taiyuan Region	MRONTR	总
1996/8/18 星期日	Nanjing University of Science and Technology	NUST	Nanjing Normal University	NNU	总
1992/12/10 星期四	North China Institute of Optoelectronics Technology	NCIOT	Luoyang Tracking and Communication Technology Research Institute	LTCTRI	总
2017/10/17 星期二	People's Liberation Army University of Science and Technology	PLAUST	Jiangsu Zhen'an Power Equipment Co., Ltd	JZPECL	总
2017/7/13 星期四	China Ordnance Industry 203 Research Institute	COIRI	Nanjing University of Science and Technology	NUST	总
2017/7/13 星期四	China Ordnance Industry 203 Research Institute	COIRI	Nanjing University of Science and Technology	NUST	总
2017/2/14 星期二	China Ordnance Industry 203 Research Institute	COIRI	Nanjing University of Science and Technology	NUST	总
2016/8/2 星期二	China Ordnance Industry 203 Research Institute	COIRI	Xi'an Chuangyida Microelectronics Measurement and Control System Co., Ltd	XCMMCSCL	总
2013/5/8 星期三	Panda Electronics Group Co., Ltd	PEGCL	Nanjing Panda Handa Technology Co., Ltd	NPHTCL	总
2013/5/8 星期三	Panda Electronics Group Co., Ltd	PEGCL	Nanjing Panda Handa Technology Co., Ltd	NPHTCL	总
2010/1/12 星期二	Beijing Institute of Technology	BIT	Beijing Star Arrow Long Sky Measurement and Control Technology Co., Ltd	BSALSMCTCL	总
2010/4/13 星期二	People's Liberation Army Armoured reconnaissance Engineering College	PLAAEC	Dezhou Hengxing Chemical Co., Ltd	DHCCL	总
2005/12/27 星期二	National Astronomical Observatories of China, Chinese Academy of Sciences	NAOCCAS	Hangzhou Electronics Institute of technology	HEI	总
2003/10/6 星期一	Beijing Institute of Technology	BIT	The 54th Research Institute of the General Staff of the People's Liberation Army General Staff Department	TRIGSPLAGSD	总
2002/8/28 星期三	China Electronic Equipment System Engineering Corporation	CEESEC	Wuhan Institute of Physics and Mathematics, Chinese Academy of Sciences	WIPMCAS	总
1996/1/27 星期六	Guangzhou Military Region Engineering Research and Design Institute	GMRERDI	General Staff Department Engineering Corps Military Representative Office in Chongqing	GSDECMROC	总
1996/1/27 星期六	Guangzhou Military Region Engineering Research and Design Institute	GMRERDI	General Staff Department Engineering Corps Military Representative Office in Chongqing	GSDECMROC	总
1996/2/12 星期一	Chinese Astronaut Research and Training Center	CARTC	Fine Chemistry Branch of Beijing Science and Technology Cooperation Center	FCBBSTCC	总
2017/10/17 星期二	Jiangsu Zhen'an Xinrun Power Technology Co., Ltd	JZXPTCL	Jiangsu Zhen'an Power Equipment Co., Ltd	JZPECL	总
2017/7/13 星期四	Xi'an Guiding Technology Co., Ltd	XGTCL	Nanjing University of Science and Technology	NUST	总
2017/7/13 星期四	Xi'an Guiding Technology Co., Ltd	XGTCL	Nanjing University of Science and Technology	NUST	总
2017/2/14 星期二	Xi'an Guiding Technology Co., Ltd	XGTCL	Nanjing University of Science and Technology	NUST	总
2016/8/2 星期二	Xi'an Guiding Technology Co., Ltd	XGTCL	Xi'an Chuangyida Microelectronics Measurement and Control System Co., Ltd	XCMMCSCL	总
2013/5/8 星期三	Nanjing Panda Electronics Co., Ltd	NPECL	Nanjing Panda Handa Technology Co., Ltd	NPHTCL	总
2013/5/8 星期三	Nanjing Panda Electronics Co., Ltd	NPECL	Nanjing Panda Handa Technology Co., Ltd	NPHTCL	总
2010/1/12 星期二	Beijing Institute of Information Engineering	BIIE	Beijing Star Arrow Long Sky Measurement and Control Technology Co., Ltd	BSALSMCTCL	总
2010/4/13 星期二	Cangzhou Changfeng Machinery Factory	CCMF	Dezhou Hengxing Chemical Co., Ltd	DHCCL	总
2005/12/27 星期二	Dalian Naval Academy of the PLA	DNAPLA	Hangzhou Electronics Institute of technology	HEI	总
2003/10/6 星期一	Anhui Hongxing Machinery Factory	AHMF	The 54th Research Institute of the General Staff of the People's Liberation Army General Staff Department	TRIGSPLAGSD	总
2002/8/28 星期三	Institute of Physics, Chinese Academy of Sciences	IPCAS	Wuhan Institute of Physics and Mathematics, Chinese Academy of Sciences	WIPMCAS	总
1996/1/27 星期六	State owned 662 Factory	SF	General Staff Department Engineering Corps Military Representative Office in Chongqing	GSDECMROC	总
1996/1/27 星期六	State owned 662 Factory	SF	General Staff Department Engineering Corps Military Representative Office in Chongqing	GSDECMROC	总
1996/2/12 星期一	Medicinal chemistry of the People's Liberation Army	MPLA	Fine Chemistry Branch of Beijing Science and Technology Cooperation Center	FCBBSTCC	总
2017/10/17 星期二	People's Liberation Army University of Science and Technology	PLAUST	Jiangsu Zhen'an Xinrun Power Technology Co., Ltd	JZXPTCL	总
2017/7/13 星期四	China Ordnance Industry 203 Research Institute	COIRI	Xi'an Guiding Technology Co., Ltd	XGTCL	总
2017/7/13 星期四	China Ordnance Industry 203 Research Institute	COIRI	Xi'an Guiding Technology Co., Ltd	XGTCL	总
2017/2/14 星期二	China Ordnance Industry 203 Research Institute	COIRI	Xi'an Guiding Technology Co., Ltd	XGTCL	总
2016/8/2 星期二	China Ordnance Industry 203 Research Institute	COIRI	Xi'an Guiding Technology Co., Ltd	XGTCL	总
2013/5/8 星期三	Panda Electronics Group Co., Ltd	PEGCL	Nanjing Panda Electronics Co., Ltd	NPECL	总
2013/5/8 星期三	Panda Electronics Group Co., Ltd	PEGCL	Nanjing Panda Electronics Co., Ltd	NPECL	总
2010/1/12 星期二	Beijing Institute of Technology	BIT	Beijing Institute of Information Engineering	BIIE	总
2010/4/13 星期二	People's Liberation Army Armoured reconnaissance Engineering College	PLAAEC	Cangzhou Changfeng Machinery Factory	CCMF	总
2005/12/27 星期二	National Astronomical Observatories of China, Chinese Academy of Sciences	NAOCCAS	Dalian Naval Academy of the PLA	DNAPLA	总
2003/10/6 星期一	Beijing Institute of Technology	BIT	Anhui Hongxing Machinery Factory	AHMF	总
2002/8/28 星期三	China Electronic Equipment System Engineering Corporation	CEESEC	Institute of Physics, Chinese Academy of Sciences	IPCAS	总
1996/1/27 星期六	Guangzhou Military Region Engineering Research and Design Institute	GMRERDI	State owned 662 Factory	SF	总
1996/1/27 星期六	Guangzhou Military Region Engineering Research and Design Institute	GMRERDI	State owned 662 Factory	SF	总
1996/2/12 星期一	Chinese Astronaut Research and Training Center	CARTC	Medicinal chemistry of the People's Liberation Army	MPLA	总
2010/10/6 星期三	Northwestern Polytechnical University	NPU	Harbin Institute of Technology	HIT	总
2012/6/20 星期三	Northwestern Polytechnical University	NPU	Baoshan Iron and Steel Co., Ltd. Special Steel Branch	BISCLSSB	总
2010/10/6 星期三	Northwestern Polytechnical University	NPU	Baoshan Iron and Steel Co., Ltd. Special Steel Branch	BISCLSSB	总
2010/10/6 星期三	Northwestern Polytechnical University	NPU	Baoshan Iron and Steel Co., Ltd. Special Steel Branch	BISCLSSB	总
2012/6/20 星期三	Northwestern Polytechnical University	NPU	Harbin Institute of Technology	HIT	总
2010/10/6 星期三	Northwestern Polytechnical University	NPU	Harbin Institute of Technology	HIT	总
2010/10/6 星期三	Northwestern Polytechnical University	NPU	Shenyang Aircraft Industry (Group) Co., Ltd	SAI(G)CL	总
2012/6/20 星期三	Northwestern Polytechnical University	NPU	Shenyang Aircraft Industry (Group) Co., Ltd	SAI(G)CL	总
2010/10/6 星期三	Northwestern Polytechnical University	NPU	Shenyang Aircraft Industry (Group) Co., Ltd	SAI(G)CL	总
2010/10/6 星期三	Harbin Institute of Technology	HIT	Baoshan Iron and Steel Co., Ltd. Special Steel Branch	BISCLSSB	总
2012/6/20 星期三	Baoshan Iron and Steel Co., Ltd. Special Steel Branch	BISCLSSB	Harbin Institute of Technology	HIT	总
2010/10/6 星期三	Baoshan Iron and Steel Co., Ltd. Special Steel Branch	BISCLSSB	Harbin Institute of Technology	HIT	总
2010/10/6 星期三	Harbin Institute of Technology	HIT	Shenyang Aircraft Industry (Group) Co., Ltd	SAI(G)CL	总
2012/6/20 星期三	Baoshan Iron and Steel Co., Ltd. Special Steel Branch	BISCLSSB	Shenyang Aircraft Industry (Group) Co., Ltd	SAI(G)CL	总
2010/10/6 星期三	Baoshan Iron and Steel Co., Ltd. Special Steel Branch	BISCLSSB	Shenyang Aircraft Industry (Group) Co., Ltd	SAI(G)CL	总
2010/10/6 星期三	Baoshan Iron and Steel Co., Ltd. Special Steel Branch	BISCLSSB	Shenyang Aircraft Industry (Group) Co., Ltd	SAI(G)CL	总
2012/6/20 星期三	Harbin Institute of Technology	HIT	Shenyang Aircraft Industry (Group) Co., Ltd	SAI(G)CL	总
2010/10/6 星期三	Harbin Institute of Technology	HIT	Shenyang Aircraft Industry (Group) Co., Ltd	SAI(G)CL	总
二零一七	Beijing Aerospace Long March Aircraft Research Institute	BALMARI			Sheet1
二零一七	Beijing Aerospace Long March Aircraft Research Institute	BALMARI			Sheet1
二零一七	Beijing Aerospace Long March Aircraft Research Institute	BALMARI			Sheet1
二零一七	China Communications Tianjin Waterway Bureau Co., Ltd	CCTWBCL			Sheet1
二零一七	China Communications Tianjin Waterway Bureau Co., Ltd	CCTWBCL			Sheet1
二零一七	China Communications Tianjin Waterway Bureau Co., Ltd	CCTWBCL			Sheet1
二零一七	The 71st Research Institute of China Shipbuilding Industry Corporation	TRICSIC			Sheet1
二零一七	Aerospace Changping Technology Co., Ltd	ACTCL			Sheet1
二零一七	Beijing Aerospace Automatic Control Research Institute	BAACRI			Sheet1
二零一七	Changsha Xiangji Haidun Technology Co., Ltd	CXHTCL			Sheet1
二零一七	Beijing Aerospace Launch Technology Research Institute	BALTRI			Sheet1
二零一七	Beijing Aerospace Long March Aircraft Research Institute	BALMARI			Sheet1
二零一七	Beijing Aerospace Automatic Control Research Institute	BAACRI			Sheet1
二零一七	Beijing Aerospace Automatic Control Research Institute	BAACRI			Sheet1
二零一七	Beijing Aerospace Automatic Control Research Institute	BAACRI			Sheet1
二零一七	Beijing Aerospace Automatic Control Research Institute	BAACRI			Sheet1
二零一七	Beijing Aerospace Automatic Control Research Institute	BAACRI			Sheet1
二零一七	92537 unit of People's Liberation Army	PLA			Sheet1
二零一七	Beijing Aerospace Automatic Control Research Institute	BAACRI			Sheet1
二零一七	Beijing Aerospace Automatic Control Research Institute	BAACRI			Sheet1
二零一七	Aerospace Materials and Technology Research Institute	AMTRI			Sheet1
二零一七	Beijing Aerospace Automatic Control Research Institute	BAACRI			Sheet1
二零一七	Beijing Aerospace Automatic Control Research Institute	BAACRI			Sheet1
二零一七	Ship Demonstration Institute of People's Liberation Army Navy Equipment Research Institute	SDIPLANERI			Sheet1
二零一七	Ship Demonstration Institute of People's Liberation Army Navy Equipment Research Institute	SDIPLANERI			Sheet1
二零一七	Ship Demonstration Institute of People's Liberation Army Navy Equipment Research Institute	SDIPLANERI			Sheet1
二零一六	Beijing Aerospace Automatic Control Research Institute	BAACRI			Sheet1
二零一六	Beijing Aerospace Automatic Control Research Institute	BAACRI			Sheet1
二零一七	Beijing Aerospace Long March Aircraft Research Institute	BALMARI			Sheet1
二零一七	Beijing Aerospace Launch Technology Research Institute	BALTRI			Sheet1
二零一七	Beijing Aerospace Automatic Control Research Institute	BAACRI			Sheet1
二零一六	Beijing Aerospace Automatic Control Research Institute	BAACRI			Sheet1
二零一七	Beijing Aerospace Automatic Control Research Institute	BAACRI			Sheet1
二零一七	Northwest Nuclear Technology Research Institute	NNTRI			Sheet1
二零一七	People's Liberation Army 63983 Unit	PLAU			Sheet1
二零一七	Aerospace Materials and Technology Research Institute	AMTRI			Sheet1
二零一七	Beijing Aerospace Automatic Control Research Institute	BAACRI			Sheet1
二零一七	Wuhan University	WU			Sheet1
二零一七	Beijing Aerospace Automatic Control Research Institute	BAACRI			Sheet1
二零一七	Aerospace Materials and Technology Research Institute	AMTRI			Sheet1
二零一七	Beijing Aerospace Launch Technology Research Institute	BALTRI			Sheet1
二零一七	Beijing Aerospace Long March Aircraft Research Institute	BALMARI			Sheet1
二零一七	Xi'an Aisheng Technology Group Co., Ltd	XATGCL			Sheet1
二零一七	Beijing Aerospace Launch Technology Research Institute	BALTRI			Sheet1
二零一七	Beijing Aerospace Automatic Control Research Institute	BAACRI			Sheet1
二零一七	Beihang University	BU			Sheet1
二零一七	Beijing Aerospace Automatic Control Research Institute	BAACRI			Sheet1
二零一七	Northwest Nuclear Technology Research Institute	NNTRI			Sheet1
二零一七	Beijing Aerospace Automatic Control Research Institute	BAACRI			Sheet1
二零一七	Beijing Aerospace Automatic Control Research Institute	BAACRI			Sheet1
二零一七	Fujian Longxi Bearing (Group) Co., Ltd	FLB(G)CL			Sheet1
二零一七	Beihang University	BU			Sheet1
二零一七	Beijing Aerospace Automatic Control Research Institute	BAACRI			Sheet1
二零一七	Capital Aerospace Machinery Company	CAMC			Sheet1
二零一七	Beijing Aerospace Automatic Control Research Institute	BAACRI			Sheet1
二零一七	Beijing Aerospace Automatic Control Research Institute	BAACRI			Sheet1
二零一七	Beijing Aerospace Automatic Control Research Institute	BAACRI			Sheet1
二零一七	Beijing Aerospace Automatic Control Research Institute	BAACRI			Sheet1
二零一七	Beijing Aerospace Automatic Control Research Institute	BAACRI			Sheet1
二零一七	Beijing Aerospace Automatic Control Research Institute	BAACRI			Sheet1
二零一七	North University of China	NUC			Sheet1
二零一七	Beijing Aerospace Automatic Control Research Institute	BAACRI			Sheet1
二零一七	Beijing Aerospace Automatic Control Research Institute	BAACRI			Sheet1
二零一七	Aerospace Materials and Technology Research Institute	AMTRI			Sheet1
二零一七	Beijing Aerospace Automatic Control Research Institute	BAACRI			Sheet1
二零一七	Beijing Aerospace Long March Aircraft Research Institute	BALMARI			Sheet1
二零一七	Beihang University	BU			Sheet1
二零一七	The 36th Research Institute of China Electronics Technology Group Corporation Corporation	TRICETGCC			Sheet1
二零一七	Beijing Institute of Technology	BIT			Sheet1
二零一七	Beijing Aerospace Long March Aircraft Research Institute	BALMARI			Sheet1
二零一七	Beijing Aerospace Long March Aircraft Research Institute	BALMARI			Sheet1
二零一七	Beijing Aerospace Long March Aircraft Research Institute	BALMARI			Sheet1
二零一七	The First Affiliated Hospital of the Third Military Medical University of the People's Liberation Army	TFAHTMMUPLA			Sheet1
二零一六	Beijing Aerospace Long March Aircraft Research Institute	BALMARI			Sheet1
二零一七	Beihang University	BU			Sheet1
二零一七	Beihang University	BU			Sheet1
二零一七	Nanjing Panda Handa Technology Co., Ltd	NPHTCL			Sheet1
二零一七	Shanghai Aerospace Electronics Co., Ltd	SAECL			Sheet1
二零一六	Aerospace Changping Technology Co., Ltd	ACTCL			Sheet1
二零一七	Ordnance Technology Research Institute of People's Liberation Army General Armaments Department	OTRIPLAGAD			Sheet1
二零一七	Naval Equipment Research Institute of the People's Liberation Army Navy	NERIPLAN			Sheet1
二零一六	People's Liberation Army Logistics Engineering College	PLALEC			Sheet1
二零一七	Naval Equipment Research Institute of the People's Liberation Army Navy	NERIPLAN			Sheet1
二零一七	Aeronautics College of the People's Liberation Army Navy Navy	ACPLANN			Sheet1
二零一七	63928 unit of the People's Liberation Army	PLA			Sheet1
二零一七	Beijing Aerospace Automatic Control Research Institute	BAACRI			Sheet1
二零一七	Gansu Yinguang Chemical Industry Group Co., Ltd	GYCIGCL			Sheet1
二零一七	Changzhou Saiying Optical Materials Co., Ltd	CSOMCL			Sheet1
二零一七	China Ordnance Industry 203 Research Institute	COIRI			Sheet1
二零一七	China Ordnance Industry 203 Research Institute	COIRI			Sheet1
二零一七	China Ordnance Industry 203 Research Institute	COIRI			Sheet1
二零一七	Beijing Institute of Technology	BIT			Sheet1
二零一七	Tongji University	TU			Sheet1
二零一七	Aerospace Materials and Technology Research Institute	AMTRI			Sheet1
二零一七	Aviation Industry Corporation of China Beijing Institute of Aeronautical Materials	AICCBIAM			Sheet1
二零一七	Aviation Industry Corporation of China Xi'an Institute of Aeronautical Computing Technology	AICCXIACT			Sheet1
二零一七	Shandong Special Industry Group Co., Ltd	SSIGCL			Sheet1
二零一七	Aviation Industry Corporation of China Xi'an Institute of Aeronautical Computing Technology	AICCXIACT			Sheet1
二零一七	Aerospace Materials and Technology Research Institute	AMTRI			Sheet1
二零一七	The 20th Research Institute of China Electronics Technology Group Corporation Corporation	TRICETGCC			Sheet1
二零一七	Shanghai Institute of Mechanical and Electrical Engineering	SIMEE			Sheet1
二零一七	Shanghai Aerospace Precision Machinery Research Institute	SAPMRI			Sheet1
二零一七	Beijing Zhuoyue Taikun Technology Co., Ltd	BZTTCL			Sheet1
二零一七	Beijing Zhuoyue Taikun Technology Co., Ltd	BZTTCL			Sheet1
二零一七	Beijing Zhuoyue Taikun Technology Co., Ltd	BZTTCL			Sheet1
二零一七	Institute of Information Engineering, Chinese Academy of Sciences	IIECAS			Sheet1
二零一七	Aerospace Materials and Technology Research Institute	AMTRI			Sheet1
二零一七	Beijing Aerospace Automatic Control Research Institute	BAACRI			Sheet1
二零一七	Beijing Aerospace Automatic Control Research Institute	BAACRI			Sheet1
二零一七	Beijing Aerospace Long March Aircraft Research Institute	BALMARI			Sheet1
二零一七	Aerospace Materials and Technology Research Institute	AMTRI			Sheet1
二零一七	Beijing Telemetry Technology Research Institute	BTTRI			Sheet1
二零一七	Aerospace Materials and Technology Research Institute	AMTRI			Sheet1
二零一七	Xidian University	XU			Sheet1
二零一七	Shenyang Aerospace University	SAU			Sheet1
二零一七	Xidian University	XU			Sheet1
二零一六	Beijing Guanzhong Jichuang Technology Co., Ltd	BGJTCL			Sheet1
二零一七	General Equipment Department Nanjing Military Representative Office in Yangzhou Region Military Representative Office	GEDNMROYRMRO			Sheet1
二零一七	People's Liberation Army Logistics Engineering College	PLALEC			Sheet1
二零一七	People's Liberation Army Logistics Engineering College	PLALEC			Sheet1
二零一七	People's Liberation Army Logistics Engineering College	PLALEC			Sheet1
二零一七	People's Liberation Army Logistics Engineering College	PLALEC			Sheet1
二零一七	People's Liberation Army Logistics Engineering College	PLALEC			Sheet1
二零一七	Beijing Aerospace Long March Aircraft Research Institute	BALMARI			Sheet1
二零一七	Shanghai Aerospace Electronic Communication Equipment Research Institute	SAECERI			Sheet1
二零一七	Beijing Aerospace Long March Aircraft Research Institute	BALMARI			Sheet1
二零一六	Aerospace Materials and Technology Research Institute	AMTRI			Sheet1
二零一七	Ship Demonstration Institute of People's Liberation Army Navy Equipment Research Institute	SDIPLANERI			Sheet1
二零一七	Ship Demonstration Institute of People's Liberation Army Navy Equipment Research Institute	SDIPLANERI			Sheet1
二零一七	Ship Demonstration Institute of People's Liberation Army Navy Equipment Research Institute	SDIPLANERI			Sheet1
二零一七	Ship Demonstration Institute of People's Liberation Army Navy Equipment Research Institute	SDIPLANERI			Sheet1
二零一七	Beijing Aerospace Long March Aircraft Research Institute	BALMARI			Sheet1
二零一七	Beijing Aerospace Automatic Control Research Institute	BAACRI			Sheet1
二零一七	Aerospace Materials and Technology Research Institute	AMTRI			Sheet1
二零一七	State owned 844 Factory	SF			Sheet1
二零一七	Anjieli Electronic Technology (Suzhou) Co., Ltd	AET(S)CL			Sheet1
二零一七	Beijing Aerospace Long March Aircraft Research Institute	BALMARI			Sheet1
二零一七	Beijing Aerospace Long March Aircraft Research Institute	BALMARI			Sheet1
二零一七	Aerospace Materials and Technology Research Institute	AMTRI			Sheet1
二零一七	Aerospace Materials and Technology Research Institute	AMTRI			Sheet1
二零一七	China Ordnance Industry 203 Research Institute	COIRI			Sheet1
二零一七	Beijing Aerospace Automatic Control Research Institute	BAACRI			Sheet1
二零一七	General Research Institute for Nonferrous Metals	GRINM			Sheet1
二零一六	Beijing Aerospace Automatic Control Research Institute	BAACRI			Sheet1
二零一六	Aerospace Materials and Technology Research Institute	AMTRI			Sheet1
二零一六	Beijing Aerospace Automatic Control Research Institute	BAACRI			Sheet1
二零一七	Beijing Aerospace Automatic Control Research Institute	BAACRI			Sheet1
二零一七	Beijing Aerospace Automatic Control Research Institute	BAACRI			Sheet1
二零一六	Beijing Aerospace Automatic Control Research Institute	BAACRI			Sheet1
二零一七	Beijing Aerospace Long March Aircraft Research Institute	BALMARI			Sheet1
二零一六	Beijing Aerospace Automatic Control Research Institute	BAACRI			Sheet1
二零一六	Beijing Aerospace Automatic Control Research Institute	BAACRI			Sheet1
二零一六	Beijing Aerospace Automatic Control Research Institute	BAACRI			Sheet1
二零一六	Beijing Aerospace Automatic Control Research Institute	BAACRI			Sheet1
二零一六	Beijing Aerospace Automatic Control Research Institute	BAACRI			Sheet1
二零一七	China Ordnance Industry Navigation and Control Technology Research Institute	COINCTRI			Sheet1
二零一七	The 32nd Research Institute of China Electronics Technology Group Corporation Corporation	TRICETGCC			Sheet1
二零一六	Beijing Aerospace Long March Aircraft Research Institute	BALMARI			Sheet1
二零一六	Beijing Aerospace Automatic Control Research Institute	BAACRI			Sheet1
二零一六	Beijing Institute of Technology	BIT			Sheet1
二零一七	Aerospace Materials and Technology Research Institute	AMTRI			Sheet1
二零一七	People's Liberation Army University of Science and Technology	PLAUST			Sheet1
二零一七	Aerospace Materials and Technology Research Institute	AMTRI			Sheet1
二零一六	Beijing Aerospace Automatic Control Research Institute	BAACRI			Sheet1
二零一六	Beijing Aerospace Automatic Control Research Institute	BAACRI			Sheet1
二零一六	Beijing Aerospace Automatic Control Research Institute	BAACRI			Sheet1
二零一六	Beijing Aerospace Automatic Control Research Institute	BAACRI			Sheet1
二零一七	Aerospace Materials and Technology Research Institute	AMTRI			Sheet1
二零一六	Beijing Aerospace Automatic Control Research Institute	BAACRI			Sheet1
二零一六	Aerospace Materials and Technology Research Institute	AMTRI			Sheet1
二零一六	Military Representative Office of the Chemical Defense Military Representative Bureau of the General Equipment Department in Wuhan Region	MROCDMRBGEDWR			Sheet1
二零一七	Beijing Aerospace Automatic Control Research Institute	BAACRI			Sheet1
二零一七	Xinxiang Taihang Power Equipment Co., Ltd	XTPECL			Sheet1
二零一六	Beijing Aerospace Automatic Control Research Institute	BAACRI			Sheet1
二零一七	Beijing Aerospace Automatic Control Research Institute	BAACRI			Sheet1
二零一六	Beijing Aerospace Automatic Control Research Institute	BAACRI			Sheet1
二零一七	Beijing Aerospace Long March Aircraft Research Institute	BALMARI			Sheet1
二零一七	Unit 91655 of People's Liberation Army	UPLA			Sheet1
二零一七	Unit 91655 of People's Liberation Army	UPLA			Sheet1
二零一六	63620 troops of the People's Liberation Army	PLA			Sheet1
二零一六	63620 troops of the People's Liberation Army	PLA			Sheet1
二零一六	63620 troops of the People's Liberation Army	PLA			Sheet1
二零一六	63620 troops of the People's Liberation Army	PLA			Sheet1
二零一六	Beijing Aerospace Long March Aircraft Research Institute	BALMARI			Sheet1
二零一七	Aerospace Materials and Technology Research Institute	AMTRI			Sheet1
二零一七	Aerospace Materials and Technology Research Institute	AMTRI			Sheet1
二零一七	Aerospace Materials and Technology Research Institute	AMTRI			Sheet1
二零一六	Beijing Aerospace Automatic Control Research Institute	BAACRI			Sheet1
二零一七	Beijing Aerospace Long March Aircraft Research Institute	BALMARI			Sheet1
二零一七	Beijing Aerospace Systems Engineering Research Institute	BASERI			Sheet1
二零一六	Beijing Aerospace Long March Aircraft Research Institute	BALMARI			Sheet1
二零一六	Beijing Aerospace Long March Aircraft Research Institute	BALMARI			Sheet1
二零一六	Beijing Aerospace Long March Aircraft Research Institute	BALMARI			Sheet1
二零一六	Beijing Aerospace Long March Aircraft Research Institute	BALMARI			Sheet1
二零一六	Beijing Aerospace Long March Aircraft Research Institute	BALMARI			Sheet1
二零一六	Beijing Aerospace Long March Aircraft Research Institute	BALMARI			Sheet1
二零一七	Beijing Aerospace Long March Aircraft Research Institute	BALMARI			Sheet1
二零一六	Beijing Aerospace Long March Aircraft Research Institute	BALMARI			Sheet1
二零一七	Aerospace Materials and Technology Research Institute	AMTRI			Sheet1
二零一六	Aerospace Materials and Technology Research Institute	AMTRI			Sheet1
二零一六	Aerospace Materials and Technology Research Institute	AMTRI			Sheet1
二零一六	Aerospace Materials and Technology Research Institute	AMTRI			Sheet1
二零一六	Aerospace Materials and Technology Research Institute	AMTRI			Sheet1
二零一七	Aerospace Materials and Technology Research Institute	AMTRI			Sheet1
二零一六	Dalian University of Technology	DUT			Sheet1
二零一七	Changzhi Tsinghua Machinery Factory	CTMF			Sheet1
二零一七	Changzhi Tsinghua Machinery Factory	CTMF			Sheet1
二零一七	The 54th Research Institute of China Electronics Technology Group Corporation Corporation	TRICETGCC			Sheet1
二零一七	The 54th Research Institute of China Electronics Technology Group Corporation Corporation	TRICETGCC			Sheet1
二零一七	The Third Research Institute of the Second Artillery Equipment Research Institute of the People's Liberation Army	TTRISAERIPLA			Sheet1
二零一七	Beijing Aerospace Automatic Control Research Institute	BAACRI			Sheet1
二零一七	People's Liberation Army 63983 Unit	PLAU			Sheet1
二零一七	715 Research Institute of China Shipbuilding Industry Corporation	RICSIC			Sheet1
二零一七	China Ordnance Industry 52nd Research Institute	COIRI			Sheet1
二零一七	China Ordnance Industry 52nd Research Institute	COIRI			Sheet1
二零一七	Beijing Institute of Technology	BIT			Sheet1
二零一七	Beijing Institute of Near Space Vehicle Systems Engineering	BINSVSE			Sheet1
二零一五	Unit 32215 of People's Liberation Army	UPLA			Sheet1
二零一五	Chemical Defense Research Institute of the People's Liberation Army Academy of Military Sciences	CDRIPLAAMS			Sheet1
二零一五	Zhejiang Sci-Tech University	ZSTU			Sheet1
二零一四	Beijing Graphics Research Institute	BGRI			Sheet1
二零一四	Beijing Precision Electromechanical Control Equipment Research Institute	BPECERI			Sheet1
二零一四	Xidian University	XU			Sheet1
二零一三	Military Representative Office of the People's Liberation Army in No. 127 Factory	MROPLANF			Sheet1
二零一四	Beijing Telemetry Technology Research Institute	BTTRI			Sheet1
二零一三	The 704 Research Institute of China Shipbuilding Industry Corporation	TRICSIC			Sheet1
二零一四	The 704 Research Institute of China Shipbuilding Industry Corporation	TRICSIC			Sheet1
二零一四	The 704 Research Institute of China Shipbuilding Industry Corporation	TRICSIC			Sheet1
二零一四	Beijing Precision Electromechanical Control Equipment Research Institute	BPECERI			Sheet1
二零一四	China Academy of Launch Vehicle Technology	CALVT			Sheet1
二零一四	Beijing Precision Electromechanical Control Equipment Research Institute	BPECERI			Sheet1
二零一四	Chengdu Aircraft Industry (Group) Co., Ltd	CAI(G)CL			Sheet1
二零一三	China Electronics Technology Standardization Research Institute	CETSRI			Sheet1
二零一三	China Electronics Technology Standardization Research Institute	CETSRI			Sheet1
二零一四	China Electronics Technology Standardization Research Institute	CETSRI			Sheet1
二零一四	China Electronics Technology Standardization Research Institute	CETSRI			Sheet1
二零一三	Nankai University	NU			Sheet1
二零一三	Jiangsu Haiming Medical Equipment Co., Ltd	JHMECL			Sheet1
二零一三	Jiangsu Haiming Medical Equipment Co., Ltd	JHMECL			Sheet1
二零一四	China Electronic Equipment System Engineering Corporation	CEESEC			Sheet1
二零一四	China Academy of Launch Vehicle Technology	CALVT			Sheet1
二零一四	The 22nd Research Institute of China Electronics Technology Group Corporation Corporation	TRICETGCC			Sheet1
二零一三	Shanghai Institute of Silicate, Chinese Academy of Sciences	SISCAS			Sheet1
二零二一	Shanghai Institute of Silicate, Chinese Academy of Sciences	SISCAS			Sheet1
二零一三	Jiangsu Haiming Medical Equipment Co., Ltd	JHMECL			Sheet1
二零一三	Jiangsu Haiming Medical Equipment Co., Ltd	JHMECL			Sheet1
二零一三	Jiangsu Haiming Medical Equipment Co., Ltd	JHMECL			Sheet1
二零一二	Northwest Nonferrous Metals Research Institute	NNMRI			Sheet1
二零一二	Northwest Nonferrous Metals Research Institute	NNMRI			Sheet1
二零一三	People's Liberation Army National University of Defense Science and Technology	PLANUDST			Sheet1
二零一二	Shanghai Institute of Space Propulsion	SISP			Sheet1
二零一三	Aviation Industry Corporation of China Leihua Electronic Technology Research Institute	AICCLETRI			Sheet1
二零一二	Shanghai Institute of Space Propulsion	SISP			Sheet1
二零一一	Northwest Nuclear Technology Research Institute	NNTRI			Sheet1
二零一一	Northwestern Polytechnical University	NPU			Sheet1
二零一二	Hudong–Zhonghua Shipbuilding (Group) Co., Ltd	HZS(G)CL			Sheet1
二零零九	92537 unit of People's Liberation Army	PLA			Sheet1
二零零九	92537 unit of People's Liberation Army	PLA			Sheet1
二零一一	Shanghai Institute of Space Propulsion	SISP			Sheet1
二零一二	Shanghai Satellite Engineering Research Institute	SSERI			Sheet1
二零零八	Ship Demonstration Institute of People's Liberation Army Navy Equipment Research Institute	SDIPLANERI			Sheet1
二零零九	Oil Training Brigade of Beijing Military Region of the People's Liberation Army	OTBBMRPLA			Sheet1
二零一二	Northwestern Polytechnical University	NPU			Sheet1
二零一一	Southwest Jiaotong University	SJU			Sheet1
二零零九	Northwestern Polytechnical University	NPU			Sheet1
二零零九	Nanjing University of Aeronautics and Astronautics	NUAA			Sheet1
二零一零	Beihang University	BU			Sheet1
二零零九	Bengbu Shenzhou Machinery Co., Ltd	BSMCL			Sheet1
二零零八	Unit 66065 of the People's Liberation Army	UPLA			Sheet1
二零一零	Shanghai Satellite Engineering Research Institute	SSERI			Sheet1
二零零九	Panda Electronics Group Co., Ltd	PEGCL			Sheet1
二零零九	National Astronomical Observatories of China, Chinese Academy of Sciences	NAOCCAS			Sheet1
二零一一	Panda Electronics Group Co., Ltd	PEGCL			Sheet1
二零零九	Panda Electronics Group Co., Ltd	PEGCL			Sheet1
二零零八	Northwest Nonferrous Metals Research Institute	NNMRI			Sheet1
二零一六	Ship Demonstration Institute of People's Liberation Army Navy Equipment Research Institute	SDIPLANERI			Sheet1
二零一二	Beihang University	BU			Sheet1
二零零六	National Time Service Center of the Chinese Academy of Sciences	NTSCCAS			Sheet1
二零零四	Engineering Research and Design Institute of Guangzhou Military Region of the People's Liberation Army	ERDIGMRPLA			Sheet1
二零零七	Northwestern Polytechnical University	NPU			Sheet1
二零一零	Beihang University	BU			Sheet1
二零零四	Engineering Research and Design Institute of Guangzhou Military Region of the People's Liberation Army	ERDIGMRPLA			Sheet1
二零零二	Engineering Research and Design Institute of Guangzhou Military Region of the People's Liberation Army	ERDIGMRPLA			Sheet1
二零零六	Beijing Institute of Technology	BIT			Sheet1
二零零一	People's Liberation Army Chongqing Police Area	PLACPA			Sheet1
二零零二	Nanjing University of Science and Technology	NUST			Sheet1
二零零二	Beijing Institute of Technology	BIT			Sheet1
二零零零	People's Liberation Army Armoured reconnaissance Engineering College	PLAAEC			Sheet1
二零零零	Guangzhou Military Region Engineering Research and Design Institute	GMRERDI			Sheet1
一九九九	Guangzhou Military Region Engineering Research and Design Institute	GMRERDI			Sheet1
一九九九	Hefei Institutes of Physical Science, Chinese Academy of Sciences	HIPSCAS			Sheet1
二零零零	Hefei Institutes of Physical Science, Chinese Academy of Sciences	HIPSCAS			Sheet1
一九九八	Chinese Astronaut Research and Training Center	CARTC			Sheet1
一九九八	92609 unit of People's Liberation Army	PLA			Sheet1
一九九五	Guangzhou Military Region Engineering Research and Design Institute	GMRERDI			Sheet1
一九九五	Guangzhou Military Region Engineering Research and Design Institute	GMRERDI			Sheet1
一九九五	Guangzhou Military Region Engineering Research and Design Institute	GMRERDI			Sheet1
一九九四	Guangzhou Military Region Engineering Research and Design Institute	GMRERDI			Sheet1
一九九九	Beijing Institute of Technology	BIT			Sheet1
一九九七	China Ordnance Industry 203 Research Institute	COIRI			Sheet1
一九九六	Northwestern Polytechnical University	NPU			Sheet1
一九九六	Nanjing University of Science and Technology	NUST			Sheet1
一九九二	North China Institute of Optoelectronics Technology	NCIOT			Sheet1
二零一七	People's Liberation Army University of Science and Technology	PLAUST			Sheet1
二零一七	China Ordnance Industry 203 Research Institute	COIRI			Sheet1
二零一七	China Ordnance Industry 203 Research Institute	COIRI			Sheet1
二零一七	China Ordnance Industry 203 Research Institute	COIRI			Sheet1
二零一六	China Ordnance Industry 203 Research Institute	COIRI			Sheet1
二零一三	Panda Electronics Group Co., Ltd	PEGCL			Sheet1
二零一三	Panda Electronics Group Co., Ltd	PEGCL			Sheet1
二零一零	Beijing Institute of Technology	BIT			Sheet1
二零一零	People's Liberation Army Armoured reconnaissance Engineering College	PLAAEC			Sheet1
二零零五	National Astronomical Observatories of China, Chinese Academy of Sciences	NAOCCAS			Sheet1
二零零三	Beijing Institute of Technology	BIT			Sheet1
二零零二	China Electronic Equipment System Engineering Corporation	CEESEC			Sheet1
一九九六	Guangzhou Military Region Engineering Research and Design Institute	GMRERDI			Sheet1
一九九六	Guangzhou Military Region Engineering Research and Design Institute	GMRERDI			Sheet1
一九九六	Chinese Astronaut Research and Training Center	CARTC			Sheet1
二零一七	Jiangsu Zhen'an Xinrun Power Technology Co., Ltd	JZXPTCL			Sheet1
二零一七	Xi'an Guiding Technology Co., Ltd	XGTCL			Sheet1
二零一七	Xi'an Guiding Technology Co., Ltd	XGTCL			Sheet1
二零一七	Xi'an Guiding Technology Co., Ltd	XGTCL			Sheet1
二零一六	Xi'an Guiding Technology Co., Ltd	XGTCL			Sheet1
二零一三	Nanjing Panda Electronics Co., Ltd	NPECL			Sheet1
二零一三	Nanjing Panda Electronics Co., Ltd	NPECL			Sheet1
二零一零	Beijing Institute of Information Engineering	BIIE			Sheet1
二零一零	Cangzhou Changfeng Machinery Factory	CCMF			Sheet1
二零零五	Dalian Naval Academy of the PLA	DNAPLA			Sheet1
二零零三	Anhui Hongxing Machinery Factory	AHMF			Sheet1
二零零二	Institute of Physics, Chinese Academy of Sciences	IPCAS			Sheet1
一九九六	State owned 662 Factory	SF			Sheet1
一九九六	State owned 662 Factory	SF			Sheet1
一九九六	Medicinal chemistry of the People's Liberation Army	MPLA			Sheet1
二零一七	People's Liberation Army University of Science and Technology	PLAUST			Sheet1
二零一七	China Ordnance Industry 203 Research Institute	COIRI			Sheet1
二零一七	China Ordnance Industry 203 Research Institute	COIRI			Sheet1
二零一七	China Ordnance Industry 203 Research Institute	COIRI			Sheet1
二零一六	China Ordnance Industry 203 Research Institute	COIRI			Sheet1
二零一三	Panda Electronics Group Co., Ltd	PEGCL			Sheet1
二零一三	Panda Electronics Group Co., Ltd	PEGCL			Sheet1
二零一零	Beijing Institute of Technology	BIT			Sheet1
二零一零	People's Liberation Army Armoured reconnaissance Engineering College	PLAAEC			Sheet1
二零零五	National Astronomical Observatories of China, Chinese Academy of Sciences	NAOCCAS			Sheet1
二零零三	Beijing Institute of Technology	BIT			Sheet1
二零零二	China Electronic Equipment System Engineering Corporation	CEESEC			Sheet1
一九九六	Guangzhou Military Region Engineering Research and Design Institute	GMRERDI			Sheet1
一九九六	Guangzhou Military Region Engineering Research and Design Institute	GMRERDI			Sheet1
一九九六	Chinese Astronaut Research and Training Center	CARTC			Sheet1
二零一零	Northwestern Polytechnical University	NPU			Sheet1
二零一二	Northwestern Polytechnical University	NPU			Sheet1
二零一零	Northwestern Polytechnical University	NPU			Sheet1
二零一零	Northwestern Polytechnical University	NPU			Sheet1
二零一二	Northwestern Polytechnical University	NPU			Sheet1
二零一零	Northwestern Polytechnical University	NPU			Sheet1
二零一零	Northwestern Polytechnical University	NPU			Sheet1
二零一二	Northwestern Polytechnical University	NPU			Sheet1
二零一零	Northwestern Polytechnical University	NPU			Sheet1
二零一零	Harbin Institute of Technology	HIT			Sheet1
二零一二	Baoshan Iron and Steel Co., Ltd. Special Steel Branch	BISCLSSB			Sheet1
二零一零	Baoshan Iron and Steel Co., Ltd. Special Steel Branch	BISCLSSB			Sheet1
二零一零	Harbin Institute of Technology	HIT			Sheet1
二零一二	Baoshan Iron and Steel Co., Ltd. Special Steel Branch	BISCLSSB			Sheet1
二零一零	Baoshan Iron and Steel Co., Ltd. Special Steel Branch	BISCLSSB			Sheet1
二零一零	Baoshan Iron and Steel Co., Ltd. Special Steel Branch	BISCLSSB			Sheet1
二零一二	Harbin Institute of Technology	HIT			Sheet1
二零一零	Harbin Institute of Technology	HIT			Sheet1
二零一七	China Academy of Launch Vehicle Technology	CALVT			Sheet1
二零一七	China Academy of Launch Vehicle Technology	CALVT			Sheet1
二零一七	China Academy of Launch Vehicle Technology	CALVT			Sheet1
二零一七	Unit 91552 of People's Liberation Army	UPLA			Sheet1
二零一七	Unit 91552 of People's Liberation Army	UPLA			Sheet1
二零一七	Unit 91552 of People's Liberation Army	UPLA			Sheet1
二零一七	Huazhong University of Science and Technology	HUST			Sheet1
二零一七	People's Liberation Army Logistics Engineering College	PLALEC			Sheet1
二零一七	China Academy of Launch Vehicle Technology	CALVT			Sheet1
二零一七	Hunan Haidun Fiber Optic Sensing Technology Engineering Laboratory Co., Ltd	HHFOSTELCL			Sheet1
二零一七	China Academy of Launch Vehicle Technology	CALVT			Sheet1
二零一七	China Academy of Launch Vehicle Technology	CALVT			Sheet1
二零一七	China Academy of Launch Vehicle Technology	CALVT			Sheet1
二零一七	China Academy of Launch Vehicle Technology	CALVT			Sheet1
二零一七	China Academy of Launch Vehicle Technology	CALVT			Sheet1
二零一七	China Academy of Launch Vehicle Technology	CALVT			Sheet1
二零一七	China Academy of Launch Vehicle Technology	CALVT			Sheet1
二零一七	Zhejiang Zhimei Environmental technology Co., Ltd	ZZECL			Sheet1
二零一七	China Academy of Launch Vehicle Technology	CALVT			Sheet1
二零一七	China Academy of Launch Vehicle Technology	CALVT			Sheet1
二零一七	China Academy of Launch Vehicle Technology	CALVT			Sheet1
二零一七	China Academy of Launch Vehicle Technology	CALVT			Sheet1
二零一七	China Academy of Launch Vehicle Technology	CALVT			Sheet1
二零一七	Changshu Ruite Electric Co., Ltd	CRECL			Sheet1
二零一七	Changshu Ruite Electric Co., Ltd	CRECL			Sheet1
二零一七	Changshu Ruite Electric Co., Ltd	CRECL			Sheet1
二零一六	China Academy of Launch Vehicle Technology	CALVT			Sheet1
二零一六	China Academy of Launch Vehicle Technology	CALVT			Sheet1
二零一七	China Academy of Launch Vehicle Technology	CALVT			Sheet1
二零一七	China Academy of Launch Vehicle Technology	CALVT			Sheet1
二零一七	China Academy of Launch Vehicle Technology	CALVT			Sheet1
二零一六	China Academy of Launch Vehicle Technology	CALVT			Sheet1
二零一七	China Academy of Launch Vehicle Technology	CALVT			Sheet1
二零一七	China Flight Test and Research Institute	CFTRI			Sheet1
二零一七	State owned 9604 Factory	SF			Sheet1
二零一七	China Academy of Launch Vehicle Technology	CALVT			Sheet1
二零一七	China Academy of Launch Vehicle Technology	CALVT			Sheet1
二零一七	Xi’an Modern Chemistry Research Institute	XMCRI			Sheet1
二零一七	China Academy of Launch Vehicle Technology	CALVT			Sheet1
二零一七	China Academy of Launch Vehicle Technology	CALVT			Sheet1
二零一七	China Academy of Launch Vehicle Technology	CALVT			Sheet1
二零一七	China Academy of Launch Vehicle Technology	CALVT			Sheet1
二零一七	Northwestern Polytechnical University	NPU			Sheet1
二零一七	China Academy of Launch Vehicle Technology	CALVT			Sheet1
二零一七	China Academy of Launch Vehicle Technology	CALVT			Sheet1
二零一七	The Third Research Institute of the Second Artillery Equipment Research Institute of the People's Liberation Army	TTRISAERIPLA			Sheet1
二零一七	China Academy of Launch Vehicle Technology	CALVT			Sheet1
二零一七	People's Liberation Army National University of Defense Science and Technology	PLANUDST			Sheet1
二零一七	China Academy of Launch Vehicle Technology	CALVT			Sheet1
二零一七	China Academy of Launch Vehicle Technology	CALVT			Sheet1
二零一七	Lu Tongxin	LT			Sheet1
二零一七	The 15th Research Institute of China Electronics Technology Group Corporation Corporation	TRICETGCC			Sheet1
二零一七	China Academy of Launch Vehicle Technology	CALVT			Sheet1
二零一七	China Academy of Launch Vehicle Technology	CALVT			Sheet1
二零一七	China Academy of Launch Vehicle Technology	CALVT			Sheet1
二零一七	China Academy of Launch Vehicle Technology	CALVT			Sheet1
二零一七	China Academy of Launch Vehicle Technology	CALVT			Sheet1
二零一七	China Academy of Launch Vehicle Technology	CALVT			Sheet1
二零一七	China Academy of Launch Vehicle Technology	CALVT			Sheet1
二零一七	China Academy of Launch Vehicle Technology	CALVT			Sheet1
二零一七	China South Industries Group North Industries Research Institute	CSIGNIRI			Sheet1
二零一七	China Academy of Launch Vehicle Technology	CALVT			Sheet1
二零一七	China Academy of Launch Vehicle Technology	CALVT			Sheet1
二零一七	China Academy of Launch Vehicle Technology	CALVT			Sheet1
二零一七	China Academy of Launch Vehicle Technology	CALVT			Sheet1
二零一七	China Academy of Launch Vehicle Technology	CALVT			Sheet1
二零一七	The Second Research Institute of the Second Artillery Equipment Research Institute of the People's Liberation Army	TSRISAERIPLA			Sheet1
二零一七	Equipment Overall Demonstration Institute of People's Liberation Army Air Force Equipment Research Institute	EODIPLAAFERI			Sheet1
二零一七	Luzhou North Chemical Industry Co., Ltd	LNCICL			Sheet1
二零一七	China Academy of Launch Vehicle Technology	CALVT			Sheet1
二零一七	China Academy of Launch Vehicle Technology	CALVT			Sheet1
二零一七	China Academy of Launch Vehicle Technology	CALVT			Sheet1
二零一七	Chongqing Zhi'en Pharmaceutical Co., Ltd	CZPCL			Sheet1
二零一六	China Academy of Launch Vehicle Technology	CALVT			Sheet1
二零一七	The 15th Research Institute of China Electronics Technology Group Corporation Corporation	TRICETGCC			Sheet1
二零一七	The 15th Research Institute of China Electronics Technology Group Corporation Corporation	TRICETGCC			Sheet1
二零一七	Panda Electronics Group Co., Ltd	PEGCL			Sheet1
二零一七	Shanghai Scientific Instrument Factory	SSIF			Sheet1
二零一六	People's Liberation Army Logistics Engineering College	PLALEC			Sheet1
二零一七	Nanjing University of Science and Technology	NUST			Sheet1
二零一七	The 10th Research Institute of China Electronics Technology Group Corporation Corporation	TRICETGCC			Sheet1
二零一六	Aerospace Changping Technology Co., Ltd	ACTCL			Sheet1
二零一七	The 10th Research Institute of China Electronics Technology Group Corporation Corporation	TRICETGCC			Sheet1
二零一七	The Third Overall Design Department of China Aerospace Science and Industry Corporation	TTODDCASIC			Sheet1
二零一七	Beijing University of Posts and Telecommunications	BUPT			Sheet1
二零一七	China Academy of Launch Vehicle Technology	CALVT			Sheet1
二零一七	Beijing Institute of Technology	BIT			Sheet1
二零一七	Institute of Radiation and Radiation Medicine, Academy of Military Medical Sciences, People's Liberation Army	IRRMAMMSPLA			Sheet1
二零一七	Xi'an Guiding Technology Co., Ltd	XGTCL			Sheet1
二零一七	Xi'an Guiding Technology Co., Ltd	XGTCL			Sheet1
二零一七	Xi'an Guiding Technology Co., Ltd	XGTCL			Sheet1
二零一七	Shanxi North Xing'an Chemical Industry Co., Ltd	SNXCICL			Sheet1
二零一七	Dongguan Tongji University Research Institute	DTURI			Sheet1
二零一七	China Academy of Launch Vehicle Technology	CALVT			Sheet1
二零一七	Aviation Industry Corporation of China Shenyang Aircraft Design and Research Institute	AICCSADRI			Sheet1
二零一七	Northwestern Polytechnical University	NPU			Sheet1
二零一七	China Ordnance Industry 52nd Research Institute	COIRI			Sheet1
二零一七	Northwestern Polytechnical University	NPU			Sheet1
二零一七	China Academy of Launch Vehicle Technology	CALVT			Sheet1
二零一七	Beijing Institute of Technology	BIT			Sheet1
二零一七	Shanghai Materials Research Institute	SMRI			Sheet1
二零一七	Shanghai Jiao Tong University	SJTU			Sheet1
二零一七	People's Liberation Army Armoured reconnaissance Engineering College	PLAAEC			Sheet1
二零一七	People's Liberation Army Armoured reconnaissance Engineering College	PLAAEC			Sheet1
二零一七	People's Liberation Army Armoured reconnaissance Engineering College	PLAAEC			Sheet1
二零一七	National Computer Network and Information Security Management Center	NCNISMC			Sheet1
二零一七	China Academy of Launch Vehicle Technology	CALVT			Sheet1
二零一七	China Academy of Launch Vehicle Technology	CALVT			Sheet1
二零一七	China Academy of Launch Vehicle Technology	CALVT			Sheet1
二零一七	China Academy of Launch Vehicle Technology	CALVT			Sheet1
二零一七	China Academy of Launch Vehicle Technology	CALVT			Sheet1
二零一七	Beijing Institute of Tracking and Communication Technology	BITCT			Sheet1
二零一七	China Academy of Launch Vehicle Technology	CALVT			Sheet1
二零一七	Xi'an Fenghuo Electronic Technology Co., Ltd	XFETCL			Sheet1
二零一七	Dalian University of Technology	DUT			Sheet1
二零一七	Xi'an Fenghuo Electronic Technology Co., Ltd	XFETCL			Sheet1
二零一六	Aeronautics College of the People's Liberation Army Navy Navy	ACPLANN			Sheet1
二零一七	Jiangsu Baoke Electronics Co., Ltd	JBECL			Sheet1
二零一七	Weihai Yingdun Special Engineering Materials Co., Ltd	WYSEMCL			Sheet1
二零一七	Weihai Yingdun Special Engineering Materials Co., Ltd	WYSEMCL			Sheet1
二零一七	Weihai Yingdun Special Engineering Materials Co., Ltd	WYSEMCL			Sheet1
二零一七	Weihai Yingdun Special Engineering Materials Co., Ltd	WYSEMCL			Sheet1
二零一七	Weihai Yingdun Special Engineering Materials Co., Ltd	WYSEMCL			Sheet1
二零一七	China Academy of Launch Vehicle Technology	CALVT			Sheet1
二零一七	Naval Engineering University	NEU			Sheet1
二零一七	China Academy of Launch Vehicle Technology	CALVT			Sheet1
二零一六	China Academy of Launch Vehicle Technology	CALVT			Sheet1
二零一七	Shanghai Jiao Tong University	SJTU			Sheet1
二零一七	Shanghai Jiao Tong University	SJTU			Sheet1
二零一七	Shanghai Jiao Tong University	SJTU			Sheet1
二零一七	Shanghai Jiao Tong University	SJTU			Sheet1
二零一七	China Academy of Launch Vehicle Technology	CALVT			Sheet1
二零一七	China Academy of Launch Vehicle Technology	CALVT			Sheet1
二零一七	China Academy of Launch Vehicle Technology	CALVT			Sheet1
二零一七	Anjieli Electronic Technology (Suzhou) Co., Ltd	AET(S)CL			Sheet1
二零一七	State owned 844 Factory	SF			Sheet1
二零一七	China Academy of Launch Vehicle Technology	CALVT			Sheet1
二零一七	China Academy of Launch Vehicle Technology	CALVT			Sheet1
二零一七	China Academy of Launch Vehicle Technology	CALVT			Sheet1
二零一七	China Academy of Launch Vehicle Technology	CALVT			Sheet1
二零一七	Xi'an Guiding Technology Co., Ltd	XGTCL			Sheet1
二零一七	China Academy of Launch Vehicle Technology	CALVT			Sheet1
二零一七	Youyan Yijin New Materials Co., Ltd	YYNMCL			Sheet1
二零一六	China Academy of Launch Vehicle Technology	CALVT			Sheet1
二零一六	China Academy of Launch Vehicle Technology	CALVT			Sheet1
二零一六	China Academy of Launch Vehicle Technology	CALVT			Sheet1
二零一七	China Academy of Launch Vehicle Technology	CALVT			Sheet1
二零一七	China Academy of Launch Vehicle Technology	CALVT			Sheet1
二零一六	China Academy of Launch Vehicle Technology	CALVT			Sheet1
二零一七	China Academy of Launch Vehicle Technology	CALVT			Sheet1
二零一六	China Academy of Launch Vehicle Technology	CALVT			Sheet1
二零一六	China Academy of Launch Vehicle Technology	CALVT			Sheet1
二零一六	China Academy of Launch Vehicle Technology	CALVT			Sheet1
二零一六	China Academy of Launch Vehicle Technology	CALVT			Sheet1
二零一六	China Academy of Launch Vehicle Technology	CALVT			Sheet1
二零一七	China North Industrial Corporation	CNIC			Sheet1
二零一七	The 61st Research Institute of the General Staff of the People's Liberation Army General Staff Department	TRIGSPLAGSD			Sheet1
二零一六	China Academy of Launch Vehicle Technology	CALVT			Sheet1
二零一六	China Academy of Launch Vehicle Technology	CALVT			Sheet1
二零一六	Beijing Information Science&Technology University	BISTU			Sheet1
二零一七	China Academy of Launch Vehicle Technology	CALVT			Sheet1
二零一七	The 28th Research Institute of China Electronics Technology Group Corporation Corporation	TRICETGCC			Sheet1
二零一七	China Academy of Launch Vehicle Technology	CALVT			Sheet1
二零一六	China Academy of Launch Vehicle Technology	CALVT			Sheet1
二零一六	China Academy of Launch Vehicle Technology	CALVT			Sheet1
二零一六	China Academy of Launch Vehicle Technology	CALVT			Sheet1
二零一六	China Academy of Launch Vehicle Technology	CALVT			Sheet1
二零一七	China Academy of Launch Vehicle Technology	CALVT			Sheet1
二零一六	China Academy of Launch Vehicle Technology	CALVT			Sheet1
二零一六	China Academy of Launch Vehicle Technology	CALVT			Sheet1
二零一六	Xinxiang Taihang Power Equipment Co., Ltd	XTPECL			Sheet1
二零一七	China Academy of Launch Vehicle Technology	CALVT			Sheet1
二零一七	Military Representative Office of the Chemical Defense Military Representative Bureau of the General Equipment Department in Wuhan Region	MROCDMRBGEDWR			Sheet1
二零一六	China Academy of Launch Vehicle Technology	CALVT			Sheet1
二零一七	China Academy of Launch Vehicle Technology	CALVT			Sheet1
二零一六	China Academy of Launch Vehicle Technology	CALVT			Sheet1
二零一七	China Academy of Launch Vehicle Technology	CALVT			Sheet1
二零一七	Institute of Computing Technology, Chinese Academy of Sciences	ICTCAS			Sheet1
二零一七	China Electronics Marine Information Technology Research Institute Co., Ltd	CEMITRICL			Sheet1
二零一六	Shanghai Jiao Tong University	SJTU			Sheet1
二零一六	Shanghai Jiao Tong University	SJTU			Sheet1
二零一六	Shanghai Jiao Tong University	SJTU			Sheet1
二零一六	Shanghai Jiao Tong University	SJTU			Sheet1
二零一六	China Academy of Launch Vehicle Technology	CALVT			Sheet1
二零一七	China Academy of Launch Vehicle Technology	CALVT			Sheet1
二零一七	China Academy of Launch Vehicle Technology	CALVT			Sheet1
二零一七	China Academy of Launch Vehicle Technology	CALVT			Sheet1
二零一六	China Academy of Launch Vehicle Technology	CALVT			Sheet1
二零一七	China Academy of Launch Vehicle Technology	CALVT			Sheet1
二零一七	China Academy of Launch Vehicle Technology	CALVT			Sheet1
二零一六	China Academy of Launch Vehicle Technology	CALVT			Sheet1
二零一六	China Academy of Launch Vehicle Technology	CALVT			Sheet1
二零一六	China Academy of Launch Vehicle Technology	CALVT			Sheet1
二零一六	China Academy of Launch Vehicle Technology	CALVT			Sheet1
二零一六	China Academy of Launch Vehicle Technology	CALVT			Sheet1
二零一六	China Academy of Launch Vehicle Technology	CALVT			Sheet1
二零一七	China Academy of Launch Vehicle Technology	CALVT			Sheet1
二零一六	China Academy of Launch Vehicle Technology	CALVT			Sheet1
二零一七	China Academy of Launch Vehicle Technology	CALVT			Sheet1
二零一六	China Academy of Launch Vehicle Technology	CALVT			Sheet1
二零一六	China Academy of Launch Vehicle Technology	CALVT			Sheet1
二零一六	China Academy of Launch Vehicle Technology	CALVT			Sheet1
二零一六	China Academy of Launch Vehicle Technology	CALVT			Sheet1
二零一七	China Academy of Launch Vehicle Technology	CALVT			Sheet1
二零一六	Dalian Naval Academy of the PLA	DNAPLA			Sheet1
二零一七	China Academy of Launch Vehicle Technology	CALVT			Sheet1
二零一七	China Academy of Launch Vehicle Technology	CALVT			Sheet1
二零一七	Beijing University of Posts and Telecommunications	BUPT			Sheet1
二零一七	Beijing University of Posts and Telecommunications	BUPT			Sheet1
二零一七	Hunan Aerospace Electromechanical Equipment and Special Materials Research Institute	HAEESMRI			Sheet1
二零一七	China Academy of Launch Vehicle Technology	CALVT			Sheet1
二零一七	Beijing Zhongke Feihong Technology Co., Ltd	BZFTCL			Sheet1
二零一七	Guangzhou Huagong Baichuan Technology Co., Ltd	GHBTCL			Sheet1
二零一七	Armoured reconnaissance Equipment Technology Research Institute of People's Liberation Army General Armaments Department	AETRIPLAGAD			Sheet1
二零一七	Armoured reconnaissance Equipment Technology Research Institute of People's Liberation Army General Armaments Department	AETRIPLAGAD			Sheet1
二零一七	Beijing Zhongyu Xintai Technology Development Co., Ltd	BZXTDCL			Sheet1
二零一七	China Academy of Launch Vehicle Technology	CALVT			Sheet1
二零一五	Jilin University	JU			Sheet1
二零一五	Institute of Industrial Ecology and Environment, Zhejiang University	IIEEZU			Sheet1
二零一五	Beijing Institute of Mechanical and Electrical Engineering	BIMEE			Sheet1
二零一四	The 54th Research Institute of China Electronics Technology Group Corporation Corporation	TRICETGCC			Sheet1
二零一四	China Academy of Launch Vehicle Technology	CALVT			Sheet1
二零一四	Air Force Engineering University	AFEU			Sheet1
二零一三	Qiqihar North Machinery Co., Ltd	QNMCL			Sheet1
二零一四	Aerospace Long March Rocket Technology Co., Ltd	ALMRTCL			Sheet1
二零一三	Ship Demonstration Institute of People's Liberation Army Navy Equipment Research Institute	SDIPLANERI			Sheet1
二零一四	Ship Demonstration Institute of People's Liberation Army Navy Equipment Research Institute	SDIPLANERI			Sheet1
二零一四	Ship Demonstration Institute of People's Liberation Army Navy Equipment Research Institute	SDIPLANERI			Sheet1
二零一四	China Academy of Launch Vehicle Technology	CALVT			Sheet1
二零一四	Beijing Precision Electromechanical Control Equipment Research Institute	BPECERI			Sheet1
二零一四	China Academy of Launch Vehicle Technology	CALVT			Sheet1
二零一四	Nanchang Hangkong University	NHU			Sheet1
二零一三	Xidian University	XU			Sheet1
二零一三	Xidian University	XU			Sheet1
二零一四	Beihang University	BU			Sheet1
二零一四	Beihang University	BU			Sheet1
二零一三	Beijing Space Electromechanical Research Institute	BSERI			Sheet1
二零一三	723 Research Institute of China Shipbuilding Industry Corporation	RICSIC			Sheet1
二零一三	723 Research Institute of China Shipbuilding Industry Corporation	RICSIC			Sheet1
二零一四	Beijing Weier Ruichuang Technology Co., Ltd	BWRTCL			Sheet1
二零一四	Beijing Precision Electromechanical Control Equipment Research Institute	BPECERI			Sheet1
二零一四	China Electronic Equipment System Engineering Corporation	CEESEC			Sheet1
二零一三	Dalian Jinma Boron Industry Technology Group Co., Ltd	DJBITGCL			Sheet1
二零二一	Dalian Jinma Boron Industry Technology Group Co., Ltd	DJBITGCL			Sheet1
二零一三	723 Research Institute of China Shipbuilding Industry Corporation	RICSIC			Sheet1
二零一三	723 Research Institute of China Shipbuilding Industry Corporation	RICSIC			Sheet1
二零一三	723 Research Institute of China Shipbuilding Industry Corporation	RICSIC			Sheet1
二零一二	Liaoning University of Technology	LUT			Sheet1
二零一二	Liaoning University of Technology	LUT			Sheet1
二零一三	Nanjing Keruida Electronic Equipment Co., Ltd	NKEECL			Sheet1
二零一二	Nanjing Zhongxu Electronic Technology Co., Ltd	NZETCL			Sheet1
二零一三	State owned 154 Factory	SF			Sheet1
二零一二	Nanjing Zhongxu Electronic Technology Co., Ltd	NZETCL			Sheet1
二零一一	Guangyuan Liyuan Radio Equipment Industry Co., Ltd	GLREICL			Sheet1
二零一一	China Ordnance Industry 204 Research Institute	COIRI			Sheet1
二零一二	Wuxi Shenxi Shipbuilding Equipment Factory	WSSEF			Sheet1
二零零九	Rizhao Hatton Plasma electrolytic oxidation Co., Ltd	RHPCL			Sheet1
二零零九	Rizhao Hatton Plasma electrolytic oxidation Co., Ltd	RHPCL			Sheet1
二零一一	Xuzhou Combustion Control Research Institute Co., Ltd	XCCRICL			Sheet1
二零一二	Shanghai Satellite Equipment Research Institute	SSERI			Sheet1
二零零八	Wuxi Wotai Technology Development Co., Ltd	WWTDCL			Sheet1
二零零九	Quartermaster Supplies and Fuel Department of the Joint Service Department of the Beijing Military Region of the People's Liberation Army	QSFDJSDBMRPLA			Sheet1
二零一二	Shanxi Pingyang Heavy Industry Machinery Co., Ltd	SPHIMCL			Sheet1
二零一一	Chengdu Jiaotong University Jingyu Technology Co., Ltd	CJUJTCL			Sheet1
二零零九	Xi'an Aerospace Engine Factory	XAEF			Sheet1
二零零九	Harbin Electric Machinery Factory Co., Ltd	HEMFCL			Sheet1
二零一零	People's Liberation Army Navy Equipment Research Institute	PLANERI			Sheet1
二零零九	People's Liberation Army 63983 Unit	PLAU			Sheet1
二零零八	State owned 446 Factory	SF			Sheet1
二零一零	Shanghai Satellite Equipment Research Institute	SSERI			Sheet1
二零零九	Nanjing Panda Electronics Co., Ltd	NPECL			Sheet1
二零零九	National Time Service Center of the Chinese Academy of Sciences	NTSCCAS			Sheet1
二零一一	Nanjing Panda Electronics Co., Ltd	NPECL			Sheet1
二零零九	Nanjing Panda Electronics Co., Ltd	NPECL			Sheet1
二零零八	Northwestern Polytechnical University	NPU			Sheet1
二零一六	Northwestern Polytechnical University	NPU			Sheet1
二零一二	Institute of Microbiology, Chinese Academy of Sciences	IMCAS			Sheet1
二零零六	National Astronomical Observatories of China, Chinese Academy of Sciences	NAOCCAS			Sheet1
二零零四	China Yaohua Glass Group Qinhuangdao Yaohua Fiberglass Factory	CYGGQYFF			Sheet1
二零零七	Baoji Rare Metal Equipment Design and Development Institute	BRMEDDI			Sheet1
二零一零	Beijing University of Technology	BUT			Sheet1
二零零四	Nanjing Nangong Mining and Metallurgy Special Equipment Manufacturing Co., Ltd	NNMMSEMCL			Sheet1
二零零二	Nanjing Nangong Mining and Metallurgy Special Equipment Manufacturing Co., Ltd	NNMMSEMCL			Sheet1
二零零六	The 54th Research Institute of the General Staff of the People's Liberation Army General Staff Department	TRIGSPLAGSD			Sheet1
二零零一	Beida Jade Bird Universal Sci-Tech Co., Ltd	BJBUSTCL			Sheet1
二零零二	Anhui Dongfeng Machinery Factory	ADMF			Sheet1
二零零二	China North Industrial Corporation	CNIC			Sheet1
二零零零	Zhongjing Asset Management Co., Ltd	ZAMCL			Sheet1
二零零零	Hubei Huazhou Co., Ltd	HHCL			Sheet1
一九九九	China Yaohua Glass Group Qinhuangdao Yaohua Fiberglass Factory	CYGGQYFF			Sheet1
一九九九	Anhui Provincial Department of Public Security	APDPS			Sheet1
二零零零	Anhui Provincial Department of National Security	APDNS			Sheet1
一九九八	Beijing Haiying Plastic arts Design Center	BHPDC			Sheet1
一九九八	Institute of Polymer chemistry, Nankai University	IPNU			Sheet1
一九九五	State owned 9603 Factory	SF			Sheet1
一九九五	State owned 9603 Factory	SF			Sheet1
一九九五	State owned 9603 Factory	SF			Sheet1
一九九四	Qinhuangdao Yaohua Fiberglass Factory	QYFF			Sheet1
一九九九	152 Factory of China Ordnance Industry Corporation	FCOIC			Sheet1
一九九七	State owned 556th Factory	SF			Sheet1
一九九六	Military Representative Office of the Navy in Taiyuan Region	MRONTR			Sheet1
一九九六	Nanjing Normal University	NNU			Sheet1
一九九二	Luoyang Tracking and Communication Technology Research Institute	LTCTRI			Sheet1
二零一七	Jiangsu Zhen'an Power Equipment Co., Ltd	JZPECL			Sheet1
二零一七	Nanjing University of Science and Technology	NUST			Sheet1
二零一七	Nanjing University of Science and Technology	NUST			Sheet1
二零一七	Nanjing University of Science and Technology	NUST			Sheet1
二零一六	Xi'an Chuangyida Microelectronics Measurement and Control System Co., Ltd	XCMMCSCL			Sheet1
二零一三	Nanjing Panda Handa Technology Co., Ltd	NPHTCL			Sheet1
二零一三	Nanjing Panda Handa Technology Co., Ltd	NPHTCL			Sheet1
二零一零	Beijing Star Arrow Long Sky Measurement and Control Technology Co., Ltd	BSALSMCTCL			Sheet1
二零一零	Dezhou Hengxing Chemical Co., Ltd	DHCCL			Sheet1
二零零五	Hangzhou Electronics Institute of technology	HEI			Sheet1
二零零三	The 54th Research Institute of the General Staff of the People's Liberation Army General Staff Department	TRIGSPLAGSD			Sheet1
二零零二	Wuhan Institute of Physics and Mathematics, Chinese Academy of Sciences	WIPMCAS			Sheet1
一九九六	General Staff Department Engineering Corps Military Representative Office in Chongqing	GSDECMROC			Sheet1
一九九六	General Staff Department Engineering Corps Military Representative Office in Chongqing	GSDECMROC			Sheet1
一九九六	Fine Chemistry Branch of Beijing Science and Technology Cooperation Center	FCBBSTCC			Sheet1
二零一七	Jiangsu Zhen'an Power Equipment Co., Ltd	JZPECL			Sheet1
二零一七	Nanjing University of Science and Technology	NUST			Sheet1
二零一七	Nanjing University of Science and Technology	NUST			Sheet1
二零一七	Nanjing University of Science and Technology	NUST			Sheet1
二零一六	Xi'an Chuangyida Microelectronics Measurement and Control System Co., Ltd	XCMMCSCL			Sheet1
二零一三	Nanjing Panda Handa Technology Co., Ltd	NPHTCL			Sheet1
二零一三	Nanjing Panda Handa Technology Co., Ltd	NPHTCL			Sheet1
二零一零	Beijing Star Arrow Long Sky Measurement and Control Technology Co., Ltd	BSALSMCTCL			Sheet1
二零一零	Dezhou Hengxing Chemical Co., Ltd	DHCCL			Sheet1
二零零五	Hangzhou Electronics Institute of technology	HEI			Sheet1
二零零三	The 54th Research Institute of the General Staff of the People's Liberation Army General Staff Department	TRIGSPLAGSD			Sheet1
二零零二	Wuhan Institute of Physics and Mathematics, Chinese Academy of Sciences	WIPMCAS			Sheet1
一九九六	General Staff Department Engineering Corps Military Representative Office in Chongqing	GSDECMROC			Sheet1
一九九六	General Staff Department Engineering Corps Military Representative Office in Chongqing	GSDECMROC			Sheet1
一九九六	Fine Chemistry Branch of Beijing Science and Technology Cooperation Center	FCBBSTCC			Sheet1
二零一七	Jiangsu Zhen'an Xinrun Power Technology Co., Ltd	JZXPTCL			Sheet1
二零一七	Xi'an Guiding Technology Co., Ltd	XGTCL			Sheet1
二零一七	Xi'an Guiding Technology Co., Ltd	XGTCL			Sheet1
二零一七	Xi'an Guiding Technology Co., Ltd	XGTCL			Sheet1
二零一六	Xi'an Guiding Technology Co., Ltd	XGTCL			Sheet1
二零一三	Nanjing Panda Electronics Co., Ltd	NPECL			Sheet1
二零一三	Nanjing Panda Electronics Co., Ltd	NPECL			Sheet1
二零一零	Beijing Institute of Information Engineering	BIIE			Sheet1
二零一零	Cangzhou Changfeng Machinery Factory	CCMF			Sheet1
二零零五	Dalian Naval Academy of the PLA	DNAPLA			Sheet1
二零零三	Anhui Hongxing Machinery Factory	AHMF			Sheet1
二零零二	Institute of Physics, Chinese Academy of Sciences	IPCAS			Sheet1
一九九六	State owned 662 Factory	SF			Sheet1
一九九六	State owned 662 Factory	SF			Sheet1
一九九六	Medicinal chemistry of the People's Liberation Army	MPLA			Sheet1
二零一零	Harbin Institute of Technology	HIT			Sheet1
二零一二	Baoshan Iron and Steel Co., Ltd. Special Steel Branch	BISCLSSB			Sheet1
二零一零	Baoshan Iron and Steel Co., Ltd. Special Steel Branch	BISCLSSB			Sheet1
二零一零	Baoshan Iron and Steel Co., Ltd. Special Steel Branch	BISCLSSB			Sheet1
二零一二	Harbin Institute of Technology	HIT			Sheet1
二零一零	Harbin Institute of Technology	HIT			Sheet1
二零一零	Shenyang Aircraft Industry (Group) Co., Ltd	SAI(G)CL			Sheet1
二零一二	Shenyang Aircraft Industry (Group) Co., Ltd	SAI(G)CL			Sheet1
二零一零	Shenyang Aircraft Industry (Group) Co., Ltd	SAI(G)CL			Sheet1
二零一零	Baoshan Iron and Steel Co., Ltd. Special Steel Branch	BISCLSSB			Sheet1
二零一二	Harbin Institute of Technology	HIT			Sheet1
二零一零	Harbin Institute of Technology	HIT			Sheet1
二零一零	Shenyang Aircraft Industry (Group) Co., Ltd	SAI(G)CL			Sheet1
二零一二	Shenyang Aircraft Industry (Group) Co., Ltd	SAI(G)CL			Sheet1
二零一零	Shenyang Aircraft Industry (Group) Co., Ltd	SAI(G)CL			Sheet1
二零一零	Shenyang Aircraft Industry (Group) Co., Ltd	SAI(G)CL			Sheet1
二零一二	Shenyang Aircraft Industry (Group) Co., Ltd	SAI(G)CL			Sheet1
二零一零	Shenyang Aircraft Industry (Group) Co., Ltd	SAI(G)CL			Sheet1

## Sheet: 92
source	target
North China Institute of Optoelectronics Technology	Luoyang Tracking and Communication Technology Research Institute

## Sheet: 94
source	target
Guangzhou Military Region Engineering Research and Design Institute	State owned 9603 Factory
Guangzhou Military Region Engineering Research and Design Institute	State owned 9603 Factory
Guangzhou Military Region Engineering Research and Design Institute	State owned 9603 Factory
Guangzhou Military Region Engineering Research and Design Institute	Qinhuangdao Yaohua Fiberglass Factory

## Sheet: 96
source	target
China Ordnance Industry 203 Research Institute	State owned 556th Factory
Northwestern Polytechnical University	Military Representative Office of the Navy in Taiyuan Region
Nanjing University of Science and Technology	Nanjing Normal University
Guangzhou Military Region Engineering Research and Design Institute	General Staff Department Engineering Corps Military Representative Office in Chongqing
Guangzhou Military Region Engineering Research and Design Institute	General Staff Department Engineering Corps Military Representative Office in Chongqing
Chinese Astronaut Research and Training Center	Fine Chemistry Branch of Beijing Science and Technology Cooperation Center
State owned 662 Factory	General Staff Department Engineering Corps Military Representative Office in Chongqing
State owned 662 Factory	General Staff Department Engineering Corps Military Representative Office in Chongqing
Medicinal chemistry of the People's Liberation Army	Fine Chemistry Branch of Beijing Science and Technology Cooperation Center
Guangzhou Military Region Engineering Research and Design Institute	State owned 662 Factory
Guangzhou Military Region Engineering Research and Design Institute	State owned 662 Factory
Chinese Astronaut Research and Training Center	Medicinal chemistry of the People's Liberation Army

## Sheet: 98
source	target
Guangzhou Military Region Engineering Research and Design Institute	China Yaohua Glass Group Qinhuangdao Yaohua Fiberglass Factory
Hefei Institutes of Physical Science, Chinese Academy of Sciences	Anhui Provincial Department of Public Security
Chinese Astronaut Research and Training Center	Beijing Haiying Plastic arts Design Center
92609 unit of People's Liberation Army	Institute of Polymer chemistry, Nankai University
Beijing Institute of Technology	152 Factory of China Ordnance Industry Corporation

## Sheet: 00
source	target
People's Liberation Army Chongqing Police Area	Beida Jade Bird Universal Sci-Tech Co., Ltd
People's Liberation Army Armoured reconnaissance Engineering College	Zhongjing Asset Management Co., Ltd
Guangzhou Military Region Engineering Research and Design Institute	Hubei Huazhou Co., Ltd
Hefei Institutes of Physical Science, Chinese Academy of Sciences	Anhui Provincial Department of National Security

## Sheet: 02
source	target
Engineering Research and Design Institute of Guangzhou Military Region of the People's Liberation Army	Nanjing Nangong Mining and Metallurgy Special Equipment Manufacturing Co., Ltd
Nanjing University of Science and Technology	Anhui Dongfeng Machinery Factory
Beijing Institute of Technology	China North Industrial Corporation
Beijing Institute of Technology	The 54th Research Institute of the General Staff of the People's Liberation Army General Staff Department
China Electronic Equipment System Engineering Corporation	Wuhan Institute of Physics and Mathematics, Chinese Academy of Sciences
Anhui Hongxing Machinery Factory	The 54th Research Institute of the General Staff of the People's Liberation Army General Staff Department
Institute of Physics, Chinese Academy of Sciences	Wuhan Institute of Physics and Mathematics, Chinese Academy of Sciences
Beijing Institute of Technology	Anhui Hongxing Machinery Factory
China Electronic Equipment System Engineering Corporation	Institute of Physics, Chinese Academy of Sciences

## Sheet: 04
source	target
Engineering Research and Design Institute of Guangzhou Military Region of the People's Liberation Army	China Yaohua Glass Group Qinhuangdao Yaohua Fiberglass Factory
Engineering Research and Design Institute of Guangzhou Military Region of the People's Liberation Army	Nanjing Nangong Mining and Metallurgy Special Equipment Manufacturing Co., Ltd
National Astronomical Observatories of China, Chinese Academy of Sciences	Hangzhou Electronics Institute of technology
Dalian Naval Academy of the PLA	Hangzhou Electronics Institute of technology
National Astronomical Observatories of China, Chinese Academy of Sciences	Dalian Naval Academy of the PLA

## Sheet: 06
source	target
National Time Service Center of the Chinese Academy of Sciences	National Astronomical Observatories of China, Chinese Academy of Sciences
Northwestern Polytechnical University	Baoji Rare Metal Equipment Design and Development Institute
Beijing Institute of Technology	The 54th Research Institute of the General Staff of the People's Liberation Army General Staff Department

## Sheet: 08
source	target
92537 unit of People's Liberation Army	Rizhao Hatton Plasma electrolytic oxidation Co., Ltd
92537 unit of People's Liberation Army	Rizhao Hatton Plasma electrolytic oxidation Co., Ltd
Ship Demonstration Institute of People's Liberation Army Navy Equipment Research Institute	Wuxi Wotai Technology Development Co., Ltd
Oil Training Brigade of Beijing Military Region of the People's Liberation Army	Quartermaster Supplies and Fuel Department of the Joint Service Department of the Beijing Military Region of the People's Liberation Army
Northwestern Polytechnical University	Xi'an Aerospace Engine Factory
Nanjing University of Aeronautics and Astronautics	Harbin Electric Machinery Factory Co., Ltd
Bengbu Shenzhou Machinery Co., Ltd	People's Liberation Army 63983 Unit
Unit 66065 of the People's Liberation Army	State owned 446 Factory
Panda Electronics Group Co., Ltd	Nanjing Panda Electronics Co., Ltd
National Astronomical Observatories of China, Chinese Academy of Sciences	National Time Service Center of the Chinese Academy of Sciences
Panda Electronics Group Co., Ltd	Nanjing Panda Electronics Co., Ltd
Northwest Nonferrous Metals Research Institute	Northwestern Polytechnical University

[truncated: 7 more sheets: 10, 12, 14, 16, 总, Sheet1, 导出计数_日期]
